# Supplementary material
Source: HighWire-hosted journal article supplement (https://erj.ersjournals.com/highwire/filestream/128973/field_highwire_adjunct_files/0/ERJ-01080-2015_Suppl.pdf)
Supplement: ERJ-01080-2015_Suppl.pdf [file ERJ-01080-2015_Suppl.pdf]

## Online Data Supplement

### **Linoleic acid-derived lipid mediators increase in a female-dominated subphenotype of COPD**

David Balgoma, PhD<sup>a,b</sup>, Mingxing Yang, MD, PhD<sup>c</sup>, Marcus Sjödin, PhD<sup>a</sup>, Stuart Snowden, PhD<sup>a</sup>, Reza Karimi, MD, PhD<sup>c</sup>, Bettina Levänen, PhD<sup>c</sup>, Heta Merikallio, PhD<sup>c,d</sup>, Riitta Kaarteenaho, MD, PhD<sup>d</sup>, Lena Palmberg, MD, PhD<sup>e</sup>, Kjell Larsson, MD, PhD<sup>e</sup>, David J. Erle, MD, PhD<sup>f</sup>, Sven-Erik Dahlén, MD, PhD<sup>g</sup>, Barbro Dahlén, MD<sup>g</sup>, C. Magnus Sköld, MD, PhD<sup>c</sup>, Åsa M. Wheelock, PhD<sup>c,\*</sup>, Craig E. Wheelock, PhD<sup>a,\*</sup>

<sup>a</sup>Division of Physiological Chemistry 2, Department of Medical Biochemistry and Biophysics, Karolinska Institutet, Stockholm, Sweden; <sup>b</sup>Institute of Environmental Medicine, Karolinska Institutet, Stockholm, Sweden, <sup>c</sup>Respiratory Medicine Unit, Department of Medicine Solna & Center for Molecular Medicine, Karolinska Institutet, Stockholm, Sweden, <sup>d</sup>Respiratory Unit, Medical Research Center Oulu, Oulu University/University Hospital, Medicine and Clinical Research, Pulmonary Division, University of Eastern Finland & Division of Respiratory Medicine, Kuopio University Hospital, Kuopio, Finland, <sup>e</sup>Lung and Airway Research Unit, Institute of Environmental Medicine, Karolinska Institutet, Stockholm, Sweden <sup>f</sup>Division of Pulmonary and Critical Care, Department of Medicine and Lung Biology Center, University of California San Francisco, USA; <sup>g</sup>Department of Respiratory Medicine and Allergy, Karolinska University Hospital Huddinge, Stockholm, Sweden

\*Correspondence to be addressed to:

Craig E. Wheelock, PhD  
Division of Physiological Chemistry 2  
Department of Medical Biochemistry and Biophysics  
Karolinska Institutet, 17177 Stockholm, Sweden  
Email: [craig.wheelock@ki.se](mailto:craig.wheelock@ki.se)  
Phone: +46 8 524 87630, fax: +46 8 736 0439

Or

Åsa Wheelock, PhD  
Lung Research Lab L4:01, Respiratory Medicine Unit & Center for Molecular Medicine,  
Department of Medicine,  
Karolinska Institutet, 17176 Stockholm, Sweden  
Email: [asa.wheelock@ki.se](mailto:asa.wheelock@ki.se)  
Phone: +46 8 517 70664, fax: +46 8 517 75451

## Supplemental materials and methods

### *Subjects and study design*

The chest X-ray as well as the clinical examination did not reveal any other significant disease than COPD. Clinical data concerning symptoms, medications (including oral contraceptives or estrogen replacement), smoking history, and additional exposures relevant for COPD were recorded by means of a questionnaire. Based upon patient questionnaire, no females consumed any potential lipid mediator-modifying medication prior to sampling (*e.g.*, NSAIDs). Two male COPD smokers reported taking Tromblyl® (acetylsalicylic acid). The study was approved by the Stockholm Regional Ethical Board (Case number 2006/959-31/1) and all volunteers gave informed written consent.

### *Sample collection*

Airway epithelial brushings as well as bronchoalveolar lavage (BAL) samples were collected by means of fiberoptic bronchoscopy as previously described (1-3). BAL samples were collected from the middle-lobe bronchus using 5 x 50 mL of phosphate buffered saline (PBS, 37°C). The combined aspirates were filtered and centrifuged at 400 g for 5 min at 4°C. Supernatant was isolated and 2 mL aliquots were kept in -80°C until analysis.

### *Chemicals*

All lipid mediator standards were purchased from Cayman Chemical (Ann Arbor, MI), with the exception of 12(13)-EpODE, 9,10,13-TriHOME and 9,12,13-TriHOME, which were obtained from Larodan (Solna, Sweden) and LTB<sub>5</sub> from Enzo Life Sciences (Farmingdale, NY). Milli-Q ultrapure deionized water was used (Millipore Corp., Billerica, MA). Isopropanol was purchased from Sigma-Aldrich. Methanol and acetonitrile were from Rathburn (Peeblesshire, U.K.). Acetic and formic acid were obtained from Fisher Scientific (Waltham, MA).

### *Lipid mediator measurements (except for cysteinyl leukotrienes and isoprostanes)*

Extraction of analytes was performed with 3cc/60 mg HLB Oasis SPE cartridges (Waters Corp., Milford, MA). Cartridges were conditioned with 3 mL of methanol and 3 mL of water/methanol 95:5 with 0.1% of acetic acid, followed by 3.3 mL of bronchoalveolar lavage fluid (BALF)

mixed with 10  $\mu\text{L}$  of internal standards in concentrations according Table E2. Cartridges were washed with 3 mL of water/methanol 95:5 with 0.1% of acetic acid and then dried under vacuum-induced air stream for 30 min. Analytes were eluted from the columns with 1 mL of methanol and 2 mL of ethyl acetate in cryotubes (Corning Inc.; Corning, NY) containing 6  $\mu\text{L}$  of glycerol 30% in methanol. After evaporation of the eluates under vacuum, samples were resuspended in 100  $\mu\text{L}$  of methanol containing 441 nM 12-([cyclohexylamino]carbonyl)amino-dodecanoic acid (CUDA), filtered by centrifugation in Amicon Ultrafree-MC, PVDF 0.1  $\mu\text{m}$  (Millipore) and transferred to autosampler vials with inserts prior to injection.

Liquid chromatography was performed on an Acquity UPLC BEH column (C18, 2.1x150 mm, 1.7 $\mu\text{m}$ , Waters). The mobile phase was a gradient of solvents A (water with 0.1% of acetic acid) and B (acetonitrile/isopropanol 90:10) with flow rate of 0.5 mL min<sup>-1</sup>. The gradient initiated with 90% of A, and changed linearly to 65% in min 3.5, to 60% in min 5.5, to 58% in min 7, to 50% in min 9 and to 35% in min 15. A XevoTQ mass spectrometer (Waters) was used to detect all compounds using electrospray ionization (ESI) in negative mode. The general MS parameters were set as follows: desolvation temperature: 600 °C; capillary voltage: 2 kV; desolvation gas (L/hr): 1000. Lipid mediators were quantified using internal and external standards (Table E1). Calibration curves were calculated by least-squares linear regression with 1/x weighting. Chromatographic retention time, mass spectrometric transitions and linear range of the calibration curve are provided in Table E2.

#### *Analysis of cysteinyl leukotrienes and isoprostanes*

Attempts were made to analyze cysteinyl leukotrienes and isoprostanes by UPLC-MS/MS. However, when methods described in (4) were applied, strong matrix effects were found to suppress the signal of the internal standards and analytes. The volume of sample extracted was optimized in order to control matrix effects on internal standards, with 1 mL of BALF the optimum. However, LTC<sub>4</sub>, LTD<sub>4</sub>, LTE<sub>4</sub>, EXC<sub>4</sub>, EXD<sub>4</sub>, EXE<sub>4</sub>, 8-isoPGF<sub>2 $\alpha$</sub>  and 8,12-iso-iPF<sub>2 $\alpha$</sub> -VI were under the limit of detection (LOD) of the method. Accordingly, cysteinyl leukotrienes were analyzed by enzyme immunoassay with the CysLT Express kit from Cayman Chemical (Ann Arbor, MI). Concentration was expressed as ng mL<sup>-1</sup>.

### *mRNA analysis*

RNA from BAL cells was extracted into two fractions containing small RNAs (including miRNAs) and large RNAs (containing mRNA) using the NucleoSpin® miRNA kit according to the manufacturer's instructions (Macherey-Nagel; Düren, Germany). RNA quality and quantity was assessed for concentration and purity by determining UV 260/280 and 230/260 absorbance ratios obtained by the Nanodrop ND-1000 spectrophotometer (Nanodrop; Wilmington, DE). RNA integrity and size distribution was examined by gel electrophoresis on RNA Pico LabChips (Agilent Technologies; Palo Alto, CA) processed on the Agilent 2100 Bioanalyzer. RNA was amplified using the Low Input Quick Amplification Kit (Agilent Technologies) according to the manufacturer's protocol, and subsequent Cy3-CTP labeling was performed by using one-color labeling kits (Agilent Technologies). Clean-up of the labeled and amplified probe was performed (Zymo Research Corporation; Irvine, CA). The size distribution and quantity of the amplified product was assessed by Nanodrop. Equal amounts of Cy3-labeled target were hybridized to Agilent human whole-genome 4x44K Ink-jet arrays containing a total of 41,000 probes corresponding to 19,596 entrez genes. Hybridizations were performed at 65°C for 17 hours at a rotation of 10 rpm. Arrays were scanned by using the Agilent microarray G2565BA scanner (Agilent Technologies) with Scan region: Agilent HD (61x21.6) and a resolution of 5µm, TIFF: 16 bit, XDR: 0.10. Raw signal intensities were extracted with Feature Extraction v10.1 software (Agilent Technologies). Flagged outliers were not included in any subsequent analyses. Microarray datasets were normalized using the *quantile* normalization method according to Bolstad (5) using the R package *limma* in *Bioconductor* (6, 7). No background subtraction was performed, and the median feature pixel intensity was used as the raw signal before normalization. Univariate and multivariate statistical analyses were performed on a selected subset of 13 probes representing 7 genes (EPHX1, EPHX2, CYP2C, CYP1A2, CYP2J, CYP3A4, and CYP2E1) involved in the biosynthesis of the EpOMEs and DiHOMEs.

### *AB-PAS staining and quantitation of airway epithelial goblet cells*

Cytospin glasses were prepared according standard methods from airway epithelial brushings collected during bronchoscopy, and stored in -70°C until use. Cytospin specimen were fixed with cold acetone (-70°C) for 10 min, followed by 3% acetic acid for 3 min. Samples were then incubated in Alcian Blue- acetic acid solution for 15 min, then washed under running water.

Subsequently, cytopsin glasses were incubated in 0.5% periodic acid for 10 min, washed, then placed in Schiff's reagent for 15 min. Samples were then counterstained with Mayer haematoxylin, and sealed with Immu-mount glue (Thermo Scientific, MI, USA) and coverslips. The number of AB-PAS positive goblet cells as well as the total number of epithelial cells were calculated per visual field with 400x magnification (Leica DM3000, hcx fl plan 40x/0.65). Two to 10 visual fields were counted depending on the cell density of the specific sample, and the results are presented as percent AB-PAS positive cells out of total cells. All samples were analysed by an experienced researcher in a blinded fashion. All chemicals were from Sigma-Aldrich (Steinheim, Germany) unless otherwise stated. Of the 11 female COPD smoker samples, 2 of the cytopsin slides were of insufficient quality to produce accurate counts. Accordingly, Figure 4D displays the results of the remaining n=9 individuals.

#### *Outlier detection in specific correlations*

With regards to the PLS correlation between the EpOMEs and DiHOMEs with lung function of female smoking COPD patients (Figure 5A), one subject (3207) was found to be a significant outlier, with a significantly higher mast cell count (Dixon Q-test  $p < 0.05$ ) compared to the other COPD subjects. The subject was excluded from the results presented in the main manuscript; however, the correlation remained significant also when including the confirmed outlier ( $r = 0.72$ ,  $p = 0.01$ ).

### **Supplemental Results**

#### *Correlation with clinical data and cell composition*

Correlations were examined for those lipid mediator and BALF cell pairs with known metabolic associations:  $\text{LTB}_4$  vs. neutrophils and 15-HETE vs. eosinophils. The only significant correlation was  $\text{LTB}_4$  vs. neutrophils ( $r = 0.56$ ;  $p = 3.4 \times 10^{-10}$ ), which associated with smoking status. No other correlations with clinical parameters or cell data were observed.

A weak correlation was found between the 5 linoleates (excluding 9,10,13-TriHOME) vs. neutrophil abundance ( $r = 0.57$ ,  $p = 0.03$ ) in the male COPD group. However, this correlation was completely driven by one subject, which was confirmed to be an outlier in terms of neutrophil abundance (Dixon's Q  $p < 0.05$ ). Exclusion of the confirmed outlier resulted in a non-significant correlation ( $r = 0.44$ ,  $p = 0.13$ ).

**Table E1. Nomenclature for lipid mediators.** Compounds are categorized by their parent polyunsaturated fatty acid (PUFA): arachidonic acid (AA), linoleic acid (LA), dihomo- $\gamma$ -linolenic acid (DGLA),  $\alpha$ -linoleic acid (ALA), eicosapentaenoic acid (EPA), docosahexaenoic acid (DHA) and mead acid (MA). In addition, compounds are provided by their analytical use as internal standards (IS) or technical standards (TS).

| PUFA | Abbreviation                                          | Common name                                                             | Systematic name                                                             |
|------|-------------------------------------------------------|-------------------------------------------------------------------------|-----------------------------------------------------------------------------|
|      | PGD <sub>2</sub>                                      | prostaglandin D <sub>2</sub>                                            | 9 $\alpha$ ,15S-dihydroxy-11-oxo-prosta-5Z,13E-dien-1-oic acid              |
|      | 11- $\beta$ -PGF <sub>2<math>\alpha</math></sub>      | 9 $\alpha$ ,11 $\beta$ -prostaglandin F <sub>2<math>\alpha</math></sub> | 9 $\alpha$ ,11 $\beta$ ,15S-trihydroxy-prosta-5Z,13E-dien-1-oic acid        |
|      | PGJ <sub>2</sub>                                      | prostaglandin J <sub>2</sub>                                            | 11-oxo-15S-hydroxy-prosta-5Z,9,13E-trien-1-oic acid                         |
|      | 15-deoxy- $\Delta$ <sup>12,14</sup> -PGJ <sub>2</sub> | 15-deoxy- $\Delta$ <sup>12,14</sup> -prostaglandin J <sub>2</sub>       | 11-oxo-prosta-5Z,9,12E,14E-tetraen-1-oic acid                               |
|      | PGE <sub>2</sub>                                      | prostaglandin E <sub>2</sub> ; dinoprostone                             | 9-oxo-11 $\alpha$ ,15S-dihydroxy-prosta-5Z,13E-dien-1-oic acid              |
|      | PGF <sub>2<math>\alpha</math></sub>                   | prostaglandin F <sub>2<math>\alpha</math></sub> ; dinoprost             | 9 $\alpha$ ,11 $\alpha$ ,15S-trihydroxy-prosta-5Z,13E-dien-1-oic acid       |
|      | 6-keto-PGF <sub>1<math>\alpha</math></sub>            | 6-keto-prostaglandin F <sub>1<math>\alpha</math></sub>                  | 6-oxo-9 $\alpha$ ,11 $\alpha$ ,15S-trihydroxy-prost-13E-en-1-oic acid       |
|      | TxB <sub>2</sub>                                      | thromboxane B <sub>2</sub>                                              | 9 $\alpha$ ,11,15S-trihydroxythromba-5Z,13E-dien-1-oic acid                 |
|      | 12-HHTrE                                              | 12-HHT                                                                  | 12-hydroxy-5Z,8E,10E-heptadecatrienoic acid                                 |
|      | PGB <sub>2</sub>                                      | prostaglandin B <sub>2</sub>                                            | 9-oxo-15S-hydroxy-prosta-5Z,8(12),13E-trien-1-oic acid                      |
| AA   | 8-isoPGE <sub>2</sub>                                 | 8-iso-prostaglandin E <sub>2</sub>                                      | 9-oxo-11 $\alpha$ ,15S-dihydroxy-(8 $\beta$ )-prosta-5Z,13E-dien-1-oic acid |
|      | LTB <sub>4</sub>                                      | leukotriene B <sub>4</sub>                                              | 5S,12R-dihydroxy-6Z,8E,10E,14Z-eicosatetraenoic acid                        |
|      | 6- <i>trans</i> -LTB <sub>4</sub>                     | 6- <i>trans</i> -leukotriene B <sub>4</sub>                             | 5S,12R-dihydroxy-6E,8E,10E,14Z-eicosatetraenoic acid                        |
|      | 20-hydroxy-LTB <sub>4</sub>                           | 20-hydroxy-leukotriene B <sub>4</sub>                                   | 5S,12R,20-trihydroxy-6Z,8E,10E,14Z-eicosatetraenoic acid                    |
|      | 20-carboxy-LTB <sub>4</sub>                           | 20-carboxy-leukotriene B <sub>4</sub>                                   | 5S,12R-dihydroxy-6Z,8E,10E,14Z-eicosatetraene-1,20-dioic acid               |
|      | 5-HETE                                                | 5-HETE                                                                  | ( $\pm$ )5-hydroxy-6E,8Z,11Z,14Z-eicosatetraenoic acid                      |
|      | 8-HETE                                                | 8-HETE                                                                  | ( $\pm$ )8-hydroxy-5Z,9E,11Z,14Z-eicosatetraenoic acid                      |
|      | 9-HETE                                                | 9-HETE                                                                  | ( $\pm$ )9-hydroxy-5Z,7E,11Z,14Z-eicosatetraenoic acid                      |
|      | 11-HETE                                               | 11-HETE                                                                 | ( $\pm$ )11-hydroxy-5Z,8Z,12E,14Z-eicosatetraenoic acid                     |
|      | 12-HETE                                               | 12-HETE                                                                 | ( $\pm$ )12-hydroxy-5Z,8Z,10E,14Z-eicosatetraenoic acid                     |
|      | 15-HETE                                               | 15-HETE                                                                 | ( $\pm$ )15-hydroxy-5Z,8Z,11Z,13E-eicosatetraenoic acid                     |
|      | 20-HETE                                               | 20-HETE                                                                 | ( $\pm$ )20-hydroxy-5Z,8Z,11Z,14Z-eicosatetraenoic acid                     |

| PUFA | Abbreviation     | Common name                       | Systematic name                                           |
|------|------------------|-----------------------------------|-----------------------------------------------------------|
| AA   | 5-KETE           | 5-oxoETE                          | 5-oxo-6E,8Z,11Z,14Z-eicosatetraenoic acid                 |
|      | 12-KETE          | 12-oxoETE                         | 12-oxo-5Z,8Z,10E,14Z-eicosatetraenoic acid                |
|      | 15-KETE          | 15-oxoETE                         | 15-oxo-5Z,8Z,11Z,13E-eicosatetraenoic acid                |
|      | 5(6)-EpETrE      | 5(6)-EET                          | (±)5(6)-epoxy-8Z,11Z,14Z-eicosatrienoic acid              |
|      | 8(9)-EpETrE      | 8(9)-EET                          | (±)8(9)-epoxy-5Z,11Z,14Z-eicosatrienoic acid              |
|      | 11(12)-EpETrE    | 11(12)-EET                        | (±)11,12-dihydroxy-5Z,8Z,14Z-eicosatrienoic acid          |
|      | 14(15)-EpETrE    | 14(15)-EET                        | (±)14(15)-epoxy-5Z,8Z,11Z-eicosatrienoic acid             |
|      | 5,6-DiHETrE      | 5,6-DHET                          | (±)5,6-dihydroxy-8Z,11Z,14Z-eicosatrienoic acid           |
|      | 8,9-DiHETrE      | 8,9-DHET                          | (±)8,9-dihydroxy-5Z,11Z,14Z-eicosatrienoic acid           |
|      | 11,12-DiHETrE    | 11,12-DHET                        | (±)11,12-dihydroxy-5Z,8Z,14Z-eicosatrienoic acid          |
|      | 14,15-DiHETrE    | 14,15-DHET                        | (±)14,15-dihydroxy-5Z,8Z,11Z-eicosatrienoic acid          |
|      | 5,6-DiHETE       | 5,6-DiHETE                        | 5,6-dihydroxy-8Z,11Z,14Z,17Z-eicosatetraenoic acid        |
|      | 5,15-DiHETE      | 5,15-DiHETE                       | 5,15-dihydroxy-6E,8Z,10Z,13E-eicosatetraenoic acid        |
|      | 8,15-DiHETE      | 8,15-DiHETE                       | 8,15-dihydroxy-5Z,9E,11Z,13E-eicosatetraenoic acid        |
|      |                  | LXA <sub>4</sub>                  | 5(S),6(R)-lipoxin A <sub>4</sub>                          |
|      | LXB <sub>4</sub> | 5(S),14(R)-lipoxin B <sub>4</sub> | 5S,14R,15S-trihydroxy-6E,8Z,10E,12E-eicosatetraenoic acid |
| LA   | 9-HODE           | 9-HODE                            | (±)-9-hydroxy-10E,12Z-octadecadienoic acid                |
|      | 13-HODE          | 13-HODE                           | (±)-13-hydroxy-9Z,11E-octadecadienoic acid                |
|      | 9-KODE           | 9-oxoODE                          | 9-oxo-10E,12Z-octadecadienoic acid                        |
|      | 13-KODE          | 13-oxoODE                         | 13-oxo-9Z,11E-octadecadienoic acid                        |
|      | 9,10,13-TriHOME  | 9,10,13-TriHOME                   | 9,10,13-trihydroxy-11E-octadecenoic acid                  |
|      | 9,12,13-TriHOME  | 9,12,13-TriHOME                   | 9,12,13-trihydroxy-10E-octadecenoic acid                  |
|      | EKODE            | <i>trans</i> -EKODE-(E)-Ib        | 9-oxo-11-(3-pentyl-2-oxiranyl)-10E-undecenoic acid        |
|      | 9(10)-EpOME      | leukotoxin                        | (±)9(10)-epoxy-12Z-octadecenoic acid                      |
|      | 12(13)-EpOME     | iso-leukotoxin                    | (±)12(13)epoxy-9Z-octadecenoic acid                       |
|      | 9,10-DiHOME      | leukotoxin diol                   | (±)9(10)-dihydroxy-12Z-octadecenoic acid                  |
|      | 12,13-DiHOME     | isoleukotoxin diol                | 12,13-dihydroxy-9Z-octadecenoic acid                      |
|      | 12(13)-EpODE     | 12(13)-EpODE                      | (±)-cis-12,13-epoxy-9Z,15Z-octadecadienoic acid           |

| <b>PUFA</b>  | <b>Abbreviation</b> | <b>Common name</b>                                  | <b>Systematic name</b>                                              |
|--------------|---------------------|-----------------------------------------------------|---------------------------------------------------------------------|
| DGLA         | PGE <sub>1</sub>    | prostaglandin E <sub>1</sub>                        | 9-oxo-11 $\alpha$ ,15S-dihydroxy-prost-13E-en-1-oic acid            |
|              | 8-HETrE             | 8-HETrE                                             | 8S-hydroxy-9E,11Z,14Z-eicosatrienoic acid                           |
|              | 15-HETrE            | 15-HETrE                                            | 15S-hydroxy-8Z,11Z,13E-eicosatrienoic acid                          |
| ALA          | 9-HOTrE             | 9-HOTE                                              | 9S-hydroxy-10E,12Z,15Z-octadecatrienoic acid                        |
|              | 13-HOTrE            | 13-HOTE                                             | 13S-hydroxy-9Z,11E,15Z-octadecatrienoic acid                        |
|              | 9-KOTrE             | 9-KOTE                                              | 9-oxo-10E,12Z,15Z-octadecatrienoic acid                             |
| EPA          | PGD <sub>3</sub>    | prostaglandin D <sub>3</sub>                        | 9 $\alpha$ ,15S-dihydroxy-11-oxo-prosta-5Z,13E,17Z-trien-1-oic acid |
|              | PGE <sub>3</sub>    | prostaglandin E <sub>3</sub>                        | 9-oxo-11 $\alpha$ ,15S-dihydroxy-prosta-5Z,13E,17Z-trien-1-oic acid |
|              | LTB <sub>5</sub>    | leukotriene B <sub>5</sub>                          | 5S,12S-dihydroxy-6Z,8E,14Z,17Z-eicosapentaenoic acid                |
|              | 5-HEPE              | 5-HEPE                                              | ( $\pm$ )-5-hydroxy-6E,8Z,11Z,14Z,17Z-eicosapentaenoic acid         |
|              | 8-HEPE              | 8-HEPE                                              | ( $\pm$ )-8-hydroxy-5Z,9E,11Z,14Z,17Z-eicosapentaenoic acid         |
|              | 9-HEPE              | 9-HEPE                                              | ( $\pm$ )-9-hydroxy-5Z,7E,11Z,14Z,17Z-eicosapentaenoic acid         |
|              | 11-HEPE             | 11-HEPE                                             | ( $\pm$ )-11-hydroxy-5Z,8Z,12E,14Z,17Z-eicosapentaenoic acid        |
|              | 12-HEPE             | 12-HEPE                                             | ( $\pm$ )-12-hydroxy-5Z,8Z,10E,14Z,17Z-eicosapentaenoic acid        |
|              | 15-HEPE             | 15-HEPE                                             | ( $\pm$ )-15-hydroxy-5Z,8Z,11Z,13E,17Z-eicosapentaenoic acid        |
|              | 18-HEPE             | 18-HEPE                                             | ( $\pm$ )-18-hydroxy-5Z,8Z,11Z,14Z,16E-eicosapentaenoic acid        |
|              | 14(15)-EpETE        | 14,15-epoxy eicosatetraenoic acid                   | ( $\pm$ )14(15)-epoxy-5Z,8Z,11Z,17Z-eicosatetraenoic acid           |
|              | 17(18)-EpETE        | 17,18-epoxy eicosatetraenoic acid                   | ( $\pm$ )17(18)-epoxy-5Z,8Z,11Z,14Z-eicosatetraenoic acid           |
|              | 14,15-DiHETE        | 14,15-DiHETE                                        | ( $\pm$ )14,15-dihydroxy-eicosa-5,8,11,17-tetraenoic acid           |
| 17,18-DiHETE | 17,18-DiHETE        | 17,18-dihydroxy-5Z,8Z,11Z,14Z-eicosatetraenoic acid |                                                                     |
|              | LXA <sub>5</sub>    | lipoxin A <sub>5</sub>                              | 5S,6R,15S-trihydroxy-7E,9E,11Z,13E,17Z-eicosapentaenoic acid        |
| DHA          | 8-HDoHE             | 8-HDoHE                                             | ( $\pm$ )8-hydroxy-4Z,6E,10Z,13Z,16Z,19Z-docosahexaenoic acid       |
|              | 11-HDoHE            | 11-HDoHE                                            | ( $\pm$ )11-hydroxy-4Z,7Z,9E,13Z,16Z,19Z-docosahexaenoic acid       |
|              | 14-HDoHE            | 14-HDoHE                                            | ( $\pm$ )14-hydroxy-4Z,7Z,10Z,12E,16Z,19Z-docosahexaenoic acid      |
|              | 17-HDoHE            | 17-HDoHE                                            | ( $\pm$ )17-hydroxy-4Z,7Z,10Z,13Z,15E,19Z-docosahexaenoic acid      |
|              | 16(17)-EpDPE        | 16(17)-EpDPE                                        | ( $\pm$ )16(17)-epoxy-4Z,7Z,10Z,13Z,19Z-docosapentaenoic acid       |



| PUFA | Abbreviation                                             | Common name                                          | Systematic name                                                                                   |
|------|----------------------------------------------------------|------------------------------------------------------|---------------------------------------------------------------------------------------------------|
|      | 19(20)-EpDPE                                             | 19(20)-EpDPE                                         | (±)19(20)-epoxy-4Z,7Z,10Z,13Z,16Z-docosapentaenoic acid                                           |
|      | 10,17-DiHDoHE                                            | protectin D <sub>1</sub>                             | 10(S),17(S)-dihydroxy-4Z,7Z,11E,13Z,15E,19Z-docosahexaenoic acid                                  |
|      | 19,20-DiHDPA                                             | 19,20-DiHDPA                                         | (±)19,20-dihydroxy-4Z,7Z,10Z,13Z,16Z-docosapentaenoic acid                                        |
| DHA  | RvD <sub>1</sub>                                         | resolvin D <sub>1</sub>                              | 7S,8R,17S-trihydroxy-4Z,9E,11E,13Z,15E,19Z-docosahexaenoic acid                                   |
|      | 17(R)-RvD <sub>1</sub>                                   | 17(R)-resolvin D <sub>1</sub>                        | 7S,8R,17R-trihydroxy-4Z,9E,11E,13Z,15E,19Z-docosahexaenoic acid                                   |
|      | RvD <sub>2</sub>                                         | resolvin D <sub>2</sub>                              | 7S,16R,17S-trihydroxy-4Z,8E,10Z,12E,14E,19Z-docosahexaenoic acid                                  |
|      | RvE <sub>1</sub>                                         | resolvin E <sub>1</sub>                              | 5S,12R,18R-trihydroxy-6Z,8E,10E,14Z,16E-eicosapentaenoic acid                                     |
| MA   | LTB <sub>3</sub>                                         | leukotriene B <sub>3</sub>                           | 5S,12R-dihydroxy-6Z,8E,10E-eicosatrienoic acid                                                    |
|      | 5-HETrE                                                  | 5-HETrE                                              | 5S-hydroxy-6E,8Z,11Z-eicosatrienoic acid                                                          |
|      | [ <sup>2</sup> H <sub>4</sub> ]-PGD <sub>2</sub>         | prostaglandin D <sub>2</sub> -d <sub>4</sub>         | 9α,15S-dihydroxy-11-oxo-prosta-5Z,13E-dien-1-oic-3,3,4,4-d <sub>4</sub> acid                      |
|      | [ <sup>2</sup> H <sub>4</sub> ]-PGE <sub>2</sub>         | prostaglandin E <sub>2</sub> -d <sub>4</sub>         | 9-oxo-11α,15S-dihydroxy-prosta-5Z,13E-dien-1-oic-3,3,4,4-d <sub>4</sub> acid                      |
|      | [ <sup>2</sup> H <sub>4</sub> ]-6-keto-PGF <sub>1α</sub> | 6-keto-prostaglandin F <sub>1α</sub> -d <sub>4</sub> | 6-oxo-9α,11α,15S-trihydroxy-prost-13E-en-1-oic-3,3,4,4-d <sub>4</sub> acid                        |
|      | [ <sup>2</sup> H <sub>4</sub> ]-PGB <sub>2</sub>         | prostaglandin B <sub>2</sub> -d <sub>4</sub>         | 9-oxo-15S-hydroxy-prosta-5Z,8(12),13E-trien-1-oic-3,3,4,4-d <sub>4</sub> acid                     |
|      | [ <sup>2</sup> H <sub>4</sub> ]-TxB <sub>2</sub>         | thromboxane B <sub>2</sub> -d <sub>4</sub>           | 9α,11,15S-trihydroxy-thromba-5Z,13E-dien-1-oic-3,3,4,4-d <sub>4</sub> acid                        |
|      | [ <sup>2</sup> H <sub>4</sub> ]-LTB <sub>4</sub>         | leukotriene B <sub>4</sub> -d <sub>4</sub>           | 5S,12R-dihydroxy-6Z,8E,10E,14Z-eicosatetraenoic-6,7,14,15-d <sub>4</sub> acid                     |
|      | [ <sup>2</sup> H <sub>8</sub> ]-5-HETE                   | 5(S)-HETE-d <sub>8</sub>                             | 5S-hydroxy-6E,8Z,11Z,14Z-eicosatetraenoic-5,6,8,9,11,12,14,15-d <sub>8</sub> acid                 |
|      | [ <sup>2</sup> H <sub>8</sub> ]-15-HETE                  | 15(S)-HETE-d <sub>8</sub>                            | 15S-hydroxy-5Z,8Z,11Z,13E-eicosatetraenoic-5,6,8,9,11,12,14,15-d <sub>8</sub> acid                |
| IS   | [ <sup>2</sup> H <sub>6</sub> ]-20-HETE                  | 20-HETE-d <sub>6</sub>                               | 20-hydroxy-5Z,8Z,11Z,14Z-eicosatetraenoic-16,16,17,17,18,18-d <sub>6</sub> acid                   |
|      | [ <sup>2</sup> H <sub>7</sub> ]-5-KETE                   | 5-OxoETE-d <sub>7</sub>                              | 5-oxo-6E,8Z,11Z,14Z-eicosatetraenoic-6,8,9,11,12,14,15-d <sub>7</sub> acid                        |
|      | [ <sup>2</sup> H <sub>11</sub> ]-11(12)-EpETrE           | 11(12)-EET-d <sub>11</sub>                           | (±)11(12)-epoxy-5Z,8Z,14Z-eicosatrienoic-16,16,17,17,18,18,19,19,20,20,20-d <sub>11</sub> acid    |
|      | [ <sup>2</sup> H <sub>11</sub> ]-14,15-DiHETrE           | 14,15-DHET-d <sub>11</sub>                           | (±)14,15-dihydroxy-5Z,8Z,11Z-eicosatrienoic-16,16,17,17,18,18,19,19,20,20,20-d <sub>11</sub> acid |
|      | [ <sup>2</sup> H <sub>4</sub> ]-9-HODE                   | 9(S)-HODE-d <sub>4</sub>                             | 9S-hydroxy-10E,12Z-octadecadienoic-9,10,12,13-d <sub>4</sub> acid                                 |
|      | [ <sup>2</sup> H <sub>4</sub> ]-9(10)-EpOME              | 9(10)-EpOME-d <sub>4</sub>                           | (±)9(10)epoxy-12Z-octadecenoic 9,10,12,13-d <sub>4</sub> acid                                     |
|      | [ <sup>2</sup> H <sub>4</sub> ]-9,10-DiHOME              | 9,10-DiHOME-d <sub>4</sub>                           | (±)9,10-dihydroxy-12Z-octadecenoic-9,10,12,13-d <sub>4</sub> acid                                 |
| TS   | CUDA                                                     | CUDA                                                 | 12-[[cyclohexylamino]carbonyl]amino]-dodecanoic acid                                              |

**Table E2. Calibration levels of the lipid mediators analyzed.** Analytical external standards are categorized by their parent polyunsaturated fatty acid (PUFA): arachidonic acid (AA), linoleic acid (LA), dihomo- $\gamma$ -linolenic acid (DGLA),  $\alpha$ -linolenic acid (ALA), eicosapentaenoic acid (EPA), docosahexaenoic acid (DHA) and mead acid (MA). In addition, compounds are provided by their analytical use as internal standards (IS) or technical standards (TS). Chromatographic retention time (RT), parent ion, product ion, the internal standard (IS) assigned to each lipid mediator and the on-column injected linear range are reported.

| PUFA        | Compound                                              | Calibration level concentration (nM) |                      |                      |                      |                       |                       |                       |                       |                       |                       |
|-------------|-------------------------------------------------------|--------------------------------------|----------------------|----------------------|----------------------|-----------------------|-----------------------|-----------------------|-----------------------|-----------------------|-----------------------|
|             |                                                       | 10                                   | 9                    | 8                    | 7                    | 6                     | 5                     | 4                     | 3                     | 2                     | 1                     |
| AA          | PGD <sub>2</sub>                                      | 4.49 10 <sup>2</sup>                 | 2.00 10 <sup>2</sup> | 3.99 10 <sup>1</sup> | 2.00 10 <sup>1</sup> | 3.99 10 <sup>0</sup>  | 9.99 10 <sup>-1</sup> | 4.99 10 <sup>-1</sup> | 2.50 10 <sup>-1</sup> | 1.25 10 <sup>-1</sup> | 4.99 10 <sup>-2</sup> |
|             | 11- $\beta$ -PGF <sub>2<math>\alpha</math></sub>      | 6.30 10 <sup>2</sup>                 | 2.80 10 <sup>2</sup> | 5.60 10 <sup>1</sup> | 2.80 10 <sup>1</sup> | 5.60 10 <sup>0</sup>  | 1.40 10 <sup>0</sup>  | 7.00 10 <sup>-1</sup> | 3.50 10 <sup>-1</sup> | 1.75 10 <sup>-1</sup> | 7.00 10 <sup>-2</sup> |
|             | PGJ <sub>2</sub>                                      | 9.04 10 <sup>2</sup>                 | 4.02 10 <sup>2</sup> | 8.04 10 <sup>1</sup> | 4.02 10 <sup>1</sup> | 8.04 10 <sup>0</sup>  | 2.01 10 <sup>0</sup>  | 1.00 10 <sup>-1</sup> | 5.02 10 <sup>-1</sup> | 2.51 10 <sup>-1</sup> | 1.00 10 <sup>-1</sup> |
|             | 15-deoxy- $\Delta$ <sup>12,14</sup> -PGJ <sub>2</sub> | 6.26 10 <sup>2</sup>                 | 2.78 10 <sup>2</sup> | 5.56 10 <sup>1</sup> | 2.78 10 <sup>1</sup> | 5.56 10 <sup>0</sup>  | 1.39 10 <sup>0</sup>  | 6.95 10 <sup>-1</sup> | 3.48 10 <sup>-1</sup> | 1.74 10 <sup>-1</sup> | 6.95 10 <sup>-2</sup> |
|             | PGE <sub>2</sub>                                      | 4.49 10 <sup>2</sup>                 | 2.00 10 <sup>2</sup> | 3.99 10 <sup>1</sup> | 2.00 10 <sup>1</sup> | 3.99 10 <sup>0</sup>  | 9.99 10 <sup>-1</sup> | 4.99 10 <sup>-1</sup> | 2.50 10 <sup>-1</sup> | 1.25 10 <sup>-1</sup> | 4.99 10 <sup>-2</sup> |
|             | PGF <sub>2<math>\alpha</math></sub>                   | 6.30 10 <sup>2</sup>                 | 2.80 10 <sup>2</sup> | 5.60 10 <sup>1</sup> | 2.80 10 <sup>1</sup> | 5.60 10 <sup>0</sup>  | 1.40 10 <sup>0</sup>  | 7.00 10 <sup>-1</sup> | 3.50 10 <sup>-1</sup> | 1.75 10 <sup>-1</sup> | 7.00 10 <sup>-2</sup> |
|             | 6-keto-PGF <sub>1<math>\alpha</math></sub>            | 6.32 10 <sup>2</sup>                 | 2.81 10 <sup>2</sup> | 5.61 10 <sup>1</sup> | 2.81 10 <sup>1</sup> | 5.61 10 <sup>0</sup>  | 1.40 10 <sup>0</sup>  | 7.02 10 <sup>-1</sup> | 3.51 10 <sup>-1</sup> | 1.75 10 <sup>-1</sup> | 7.02 10 <sup>-2</sup> |
|             | TxB <sub>2</sub>                                      | 1.12 10 <sup>3</sup>                 | 4.97 10 <sup>2</sup> | 9.93 10 <sup>1</sup> | 4.97 10 <sup>1</sup> | 9.93 10 <sup>0</sup>  | 2.48 10 <sup>0</sup>  | 1.24 10 <sup>0</sup>  | 6.21 10 <sup>-1</sup> | 3.10 10 <sup>-1</sup> | 1.24 10 <sup>-1</sup> |
|             | 12-HHTrE                                              | 2.25 10 <sup>2</sup>                 | 9.99 10 <sup>1</sup> | 2.00 10 <sup>1</sup> | 9.99 10 <sup>0</sup> | 2.00 10 <sup>0</sup>  | 4.99 10 <sup>-1</sup> | 2.50 10 <sup>-1</sup> | 1.25 10 <sup>-1</sup> | 6.24 10 <sup>-2</sup> | 2.50 10 <sup>-2</sup> |
|             | PGB <sub>2</sub>                                      | 2.15 10 <sup>3</sup>                 | 9.57 10 <sup>2</sup> | 1.91 10 <sup>2</sup> | 9.57 10 <sup>1</sup> | 1.91 10 <sup>1</sup>  | 4.78 10 <sup>0</sup>  | 2.39 10 <sup>0</sup>  | 1.20 10 <sup>0</sup>  | 5.98 10 <sup>-1</sup> | 2.39 10 <sup>-1</sup> |
|             | 8-isoPGE <sub>2</sub>                                 | 4.49 10 <sup>2</sup>                 | 2.00 10 <sup>2</sup> | 3.99 10 <sup>1</sup> | 2.00 10 <sup>1</sup> | 3.99 10 <sup>0</sup>  | 9.99 10 <sup>-1</sup> | 4.99 10 <sup>-1</sup> | 2.50 10 <sup>-1</sup> | 1.25 10 <sup>-1</sup> | 4.99 10 <sup>-2</sup> |
|             | LTB <sub>4</sub>                                      | 4.49 10 <sup>2</sup>                 | 2.00 10 <sup>2</sup> | 3.99 10 <sup>1</sup> | 2.00 10 <sup>1</sup> | 3.99 10 <sup>0</sup>  | 9.99 10 <sup>-1</sup> | 4.99 10 <sup>-1</sup> | 2.50 10 <sup>-1</sup> | 1.25 10 <sup>-1</sup> | 4.99 10 <sup>-2</sup> |
|             | 6- <i>trans</i> -LTB <sub>4</sub>                     | 4.49 10 <sup>2</sup>                 | 2.00 10 <sup>2</sup> | 3.99 10 <sup>1</sup> | 2.00 10 <sup>1</sup> | 3.99 10 <sup>0</sup>  | 9.99 10 <sup>-1</sup> | 4.99 10 <sup>-1</sup> | 2.50 10 <sup>-1</sup> | 1.25 10 <sup>-1</sup> | 4.99 10 <sup>-2</sup> |
|             | 20-hydroxy-LTB <sub>4</sub>                           | 4.49 10 <sup>2</sup>                 | 2.00 10 <sup>2</sup> | 3.99 10 <sup>1</sup> | 2.00 10 <sup>1</sup> | 3.99 10 <sup>0</sup>  | 9.99 10 <sup>-1</sup> | 4.99 10 <sup>-1</sup> | 2.50 10 <sup>-1</sup> | 1.25 10 <sup>-1</sup> | 4.99 10 <sup>-2</sup> |
|             | 20-carboxy-LTB <sub>4</sub>                           | 4.52 10 <sup>2</sup>                 | 2.01 10 <sup>2</sup> | 4.02 10 <sup>1</sup> | 2.01 10 <sup>1</sup> | 4.02 10 <sup>0</sup>  | 1.00 10 <sup>0</sup>  | 5.02 10 <sup>-1</sup> | 2.51 10 <sup>-1</sup> | 1.26 10 <sup>-1</sup> | 5.02 10 <sup>-2</sup> |
|             | 5-HETE                                                | 2.12 10 <sup>3</sup>                 | 9.44 10 <sup>2</sup> | 1.89 10 <sup>2</sup> | 9.44 10 <sup>1</sup> | 1.89 10 <sup>1</sup>  | 4.72 10 <sup>0</sup>  | 2.36 10 <sup>0</sup>  | 1.18 10 <sup>0</sup>  | 5.90 10 <sup>-1</sup> | 2.36 10 <sup>-1</sup> |
|             | 8-HETE                                                | 2.15 10 <sup>3</sup>                 | 9.54 10 <sup>2</sup> | 1.91 10 <sup>2</sup> | 9.54 10 <sup>1</sup> | 1.91 10 <sup>1</sup>  | 4.77 10 <sup>0</sup>  | 2.38 10 <sup>0</sup>  | 1.19 10 <sup>0</sup>  | 5.96 10 <sup>-1</sup> | 2.38 10 <sup>-1</sup> |
|             | 9-HETE                                                | 2.13 10 <sup>3</sup>                 | 9.49 10 <sup>2</sup> | 1.90 10 <sup>2</sup> | 9.49 10 <sup>1</sup> | 1.90 10 <sup>1</sup>  | 4.74 10 <sup>0</sup>  | 2.37 10 <sup>0</sup>  | 1.19 10 <sup>0</sup>  | 5.93 10 <sup>-1</sup> | 2.37 10 <sup>-1</sup> |
|             | 11-HETE                                               | 2.15 10 <sup>3</sup>                 | 9.54 10 <sup>2</sup> | 1.91 10 <sup>2</sup> | 9.54 10 <sup>1</sup> | 1.91 10 <sup>1</sup>  | 4.77 10 <sup>0</sup>  | 2.38 10 <sup>0</sup>  | 1.19 10 <sup>0</sup>  | 5.96 10 <sup>-1</sup> | 2.38 10 <sup>-1</sup> |
|             | 12-HETE                                               | 2.15 10 <sup>3</sup>                 | 9.54 10 <sup>2</sup> | 1.91 10 <sup>2</sup> | 9.54 10 <sup>1</sup> | 1.91 10 <sup>1</sup>  | 4.77 10 <sup>0</sup>  | 2.38 10 <sup>0</sup>  | 1.19 10 <sup>0</sup>  | 5.96 10 <sup>-1</sup> | 2.38 10 <sup>-1</sup> |
|             | 15-HETE                                               | 2.19 10 <sup>3</sup>                 | 9.73 10 <sup>2</sup> | 1.95 10 <sup>2</sup> | 9.73 10 <sup>1</sup> | 1.95 10 <sup>1</sup>  | 4.87 10 <sup>0</sup>  | 2.43 10 <sup>0</sup>  | 1.22 10 <sup>0</sup>  | 6.08 10 <sup>-1</sup> | 2.43 10 <sup>-1</sup> |
|             | 20-HETE                                               | 6.29 10 <sup>2</sup>                 | 2.80 10 <sup>2</sup> | 5.59 10 <sup>1</sup> | 2.80 10 <sup>1</sup> | 5.59 10 <sup>0</sup>  | 1.40 10 <sup>0</sup>  | 6.99 10 <sup>-1</sup> | 3.49 10 <sup>-1</sup> | 1.75 10 <sup>-1</sup> | 6.99 10 <sup>-2</sup> |
|             | 5-KETE                                                | 2.26 10 <sup>2</sup>                 | 1.00 10 <sup>2</sup> | 2.01 10 <sup>1</sup> | 1.00 10 <sup>1</sup> | 2.01 10 <sup>0</sup>  | 5.02 10 <sup>-1</sup> | 2.51 10 <sup>-1</sup> | 1.26 10 <sup>-1</sup> | 6.28 10 <sup>-2</sup> | 2.51 10 <sup>-2</sup> |
|             | 12-KETE                                               | 2.26 10 <sup>2</sup>                 | 1.00 10 <sup>2</sup> | 2.01 10 <sup>1</sup> | 1.00 10 <sup>1</sup> | 2.01 10 <sup>0</sup>  | 5.02 10 <sup>-1</sup> | 2.51 10 <sup>-1</sup> | 1.26 10 <sup>-1</sup> | 6.28 10 <sup>-2</sup> | 2.51 10 <sup>-2</sup> |
|             | 15-KETE                                               | 2.26 10 <sup>2</sup>                 | 1.00 10 <sup>2</sup> | 2.01 10 <sup>1</sup> | 1.00 10 <sup>1</sup> | 2.01 10 <sup>0</sup>  | 5.02 10 <sup>-1</sup> | 2.51 10 <sup>-1</sup> | 1.26 10 <sup>-1</sup> | 6.28 10 <sup>-2</sup> | 2.51 10 <sup>-2</sup> |
| 5(6)-EpETrE | 2.25 10 <sup>2</sup>                                  | 9.98 10 <sup>1</sup>                 | 2.00 10 <sup>1</sup> | 9.98 10 <sup>0</sup> | 2.00 10 <sup>0</sup> | 4.99 10 <sup>-1</sup> | 2.50 10 <sup>-1</sup> | 1.25 10 <sup>-1</sup> | 6.24 10 <sup>-2</sup> | 2.50 10 <sup>-2</sup> |                       |

| PUFA         | Compound             | Calibration level concentration (nM) |                      |                      |                      |                       |                       |                       |                       |                       |                       |
|--------------|----------------------|--------------------------------------|----------------------|----------------------|----------------------|-----------------------|-----------------------|-----------------------|-----------------------|-----------------------|-----------------------|
|              |                      | 10                                   | 9                    | 8                    | 7                    | 6                     | 5                     | 4                     | 3                     | 2                     | 1                     |
| AA           | 8(9)-EpETrE          | 2.25 10 <sup>2</sup>                 | 9.98 10 <sup>1</sup> | 2.00 10 <sup>1</sup> | 9.98 10 <sup>0</sup> | 2.00 10 <sup>0</sup>  | 4.99 10 <sup>-1</sup> | 2.50 10 <sup>-1</sup> | 1.25 10 <sup>-1</sup> | 6.24 10 <sup>-2</sup> | 2.50 10 <sup>-2</sup> |
|              | 11(12)-EpETrE        | 4.49 10 <sup>2</sup>                 | 2.00 10 <sup>2</sup> | 3.99 10 <sup>1</sup> | 2.00 10 <sup>1</sup> | 3.99 10 <sup>0</sup>  | 9.98 10 <sup>-1</sup> | 4.99 10 <sup>-1</sup> | 2.50 10 <sup>-1</sup> | 1.25 10 <sup>-1</sup> | 4.99 10 <sup>-2</sup> |
|              | 14(15)-EpETrE        | 2.25 10 <sup>2</sup>                 | 9.98 10 <sup>1</sup> | 2.00 10 <sup>1</sup> | 9.98 10 <sup>0</sup> | 2.00 10 <sup>0</sup>  | 4.99 10 <sup>-1</sup> | 2.50 10 <sup>-1</sup> | 1.25 10 <sup>-1</sup> | 6.24 10 <sup>-2</sup> | 2.50 10 <sup>-2</sup> |
|              | 5,6-DiHETrE          | 4.52 10 <sup>2</sup>                 | 2.01 10 <sup>2</sup> | 4.02 10 <sup>1</sup> | 2.01 10 <sup>1</sup> | 4.02 10 <sup>0</sup>  | 1.00 10 <sup>0</sup>  | 5.02 10 <sup>-1</sup> | 2.51 10 <sup>-1</sup> | 1.26 10 <sup>-1</sup> | 5.02 10 <sup>-2</sup> |
|              | 8,9-DiHETrE          | 4.49 10 <sup>2</sup>                 | 2.00 10 <sup>2</sup> | 3.99 10 <sup>1</sup> | 2.00 10 <sup>1</sup> | 3.99 10 <sup>0</sup>  | 9.99 10 <sup>-1</sup> | 4.99 10 <sup>-1</sup> | 2.50 10 <sup>-1</sup> | 1.25 10 <sup>-1</sup> | 4.99 10 <sup>-2</sup> |
|              | 11,12-DiHETrE        | 4.52 10 <sup>2</sup>                 | 2.01 10 <sup>2</sup> | 4.02 10 <sup>1</sup> | 2.01 10 <sup>1</sup> | 4.02 10 <sup>0</sup>  | 1.00 10 <sup>0</sup>  | 5.02 10 <sup>-1</sup> | 2.51 10 <sup>-1</sup> | 1.26 10 <sup>-1</sup> | 5.02 10 <sup>-2</sup> |
|              | 14,15-DiHETrE        | 4.52 10 <sup>2</sup>                 | 2.01 10 <sup>2</sup> | 4.02 10 <sup>1</sup> | 2.01 10 <sup>1</sup> | 4.02 10 <sup>0</sup>  | 1.00 10 <sup>0</sup>  | 5.02 10 <sup>-1</sup> | 2.51 10 <sup>-1</sup> | 1.26 10 <sup>-1</sup> | 5.02 10 <sup>-2</sup> |
|              | 5,6-DiHETE           | 2.25 10 <sup>2</sup>                 | 9.99 10 <sup>1</sup> | 2.00 10 <sup>1</sup> | 9.99 10 <sup>0</sup> | 2.00 10 <sup>0</sup>  | 4.99 10 <sup>-1</sup> | 2.50 10 <sup>-1</sup> | 1.25 10 <sup>-1</sup> | 6.24 10 <sup>-2</sup> | 2.50 10 <sup>-2</sup> |
|              | 5,15-DiHETE          | 2.25 10 <sup>2</sup>                 | 9.99 10 <sup>1</sup> | 2.00 10 <sup>1</sup> | 9.99 10 <sup>0</sup> | 2.00 10 <sup>0</sup>  | 4.99 10 <sup>-1</sup> | 2.50 10 <sup>-1</sup> | 1.25 10 <sup>-1</sup> | 6.24 10 <sup>-2</sup> | 2.50 10 <sup>-2</sup> |
|              | 8,15-DiHETE          | 1.34 10 <sup>2</sup>                 | 5.94 10 <sup>1</sup> | 1.19 10 <sup>1</sup> | 5.94 10 <sup>0</sup> | 1.19 10 <sup>0</sup>  | 2.97 10 <sup>-1</sup> | 1.49 10 <sup>-1</sup> | 7.43 10 <sup>-2</sup> | 3.71 10 <sup>-2</sup> | 1.49 10 <sup>-2</sup> |
|              | LXA <sub>4</sub>     | 1.33 10 <sup>2</sup>                 | 5.90 10 <sup>1</sup> | 1.18 10 <sup>1</sup> | 5.90 10 <sup>0</sup> | 1.18 10 <sup>0</sup>  | 2.95 10 <sup>-1</sup> | 1.48 10 <sup>-1</sup> | 7.38 10 <sup>-2</sup> | 3.69 10 <sup>-2</sup> | 1.48 10 <sup>-2</sup> |
|              | LXB <sub>4</sub>     | 1.34 10 <sup>2</sup>                 | 5.94 10 <sup>1</sup> | 1.19 10 <sup>1</sup> | 5.94 10 <sup>0</sup> | 1.19 10 <sup>0</sup>  | 2.97 10 <sup>-1</sup> | 1.49 10 <sup>-1</sup> | 7.43 10 <sup>-2</sup> | 3.71 10 <sup>-2</sup> | 1.49 10 <sup>-2</sup> |
| LA           | 9-HODE               | 4.49 10 <sup>3</sup>                 | 2.00 10 <sup>3</sup> | 3.99 10 <sup>2</sup> | 2.00 10 <sup>2</sup> | 3.99 10 <sup>1</sup>  | 9.98 10 <sup>0</sup>  | 4.99 10 <sup>0</sup>  | 2.50 10 <sup>0</sup>  | 1.25 10 <sup>0</sup>  | 4.99 10 <sup>-1</sup> |
|              | 13-HODE              | 4.49 10 <sup>3</sup>                 | 2.00 10 <sup>3</sup> | 3.99 10 <sup>2</sup> | 2.00 10 <sup>2</sup> | 3.99 10 <sup>1</sup>  | 9.98 10 <sup>0</sup>  | 4.99 10 <sup>0</sup>  | 2.50 10 <sup>0</sup>  | 1.25 10 <sup>0</sup>  | 4.99 10 <sup>-1</sup> |
|              | 9-KODE               | 2.26 10 <sup>2</sup>                 | 1.01 10 <sup>2</sup> | 2.01 10 <sup>1</sup> | 1.01 10 <sup>1</sup> | 2.01 10 <sup>0</sup>  | 5.03 10 <sup>-1</sup> | 2.51 10 <sup>-1</sup> | 1.26 10 <sup>-1</sup> | 6.28 10 <sup>-2</sup> | 2.51 10 <sup>-2</sup> |
|              | 13-KODE              | 2.26 10 <sup>2</sup>                 | 1.01 10 <sup>2</sup> | 2.01 10 <sup>1</sup> | 1.01 10 <sup>1</sup> | 2.01 10 <sup>0</sup>  | 5.03 10 <sup>-1</sup> | 2.51 10 <sup>-1</sup> | 1.26 10 <sup>-1</sup> | 6.28 10 <sup>-2</sup> | 2.51 10 <sup>-2</sup> |
|              | 9,10,13-TriHOME      | 2.07 10 <sup>3</sup>                 | 9.20 10 <sup>2</sup> | 1.84 10 <sup>2</sup> | 9.20 10 <sup>1</sup> | 1.84 10 <sup>1</sup>  | 4.60 10 <sup>0</sup>  | 2.30 10 <sup>0</sup>  | 1.15 10 <sup>0</sup>  | 5.75 10 <sup>-1</sup> | 2.30 10 <sup>-1</sup> |
|              | 9,12,13-TriHOME      | 2.05 10 <sup>3</sup>                 | 9.10 10 <sup>2</sup> | 1.82 10 <sup>2</sup> | 9.10 10 <sup>1</sup> | 1.82 10 <sup>1</sup>  | 4.55 10 <sup>0</sup>  | 2.28 10 <sup>0</sup>  | 1.14 10 <sup>0</sup>  | 5.69 10 <sup>-1</sup> | 2.28 10 <sup>-1</sup> |
|              | EKODE                | 2.26 10 <sup>2</sup>                 | 1.01 10 <sup>2</sup> | 2.01 10 <sup>1</sup> | 1.01 10 <sup>1</sup> | 2.01 10 <sup>0</sup>  | 5.03 10 <sup>-1</sup> | 2.51 10 <sup>-1</sup> | 1.26 10 <sup>-1</sup> | 6.29 10 <sup>-2</sup> | 2.51 10 <sup>-2</sup> |
|              | 9(10)-EpOME          | 4.49 10 <sup>2</sup>                 | 2.00 10 <sup>2</sup> | 3.99 10 <sup>1</sup> | 2.00 10 <sup>1</sup> | 3.99 10 <sup>0</sup>  | 9.98 10 <sup>-1</sup> | 4.99 10 <sup>-1</sup> | 2.50 10 <sup>-1</sup> | 1.25 10 <sup>-1</sup> | 4.99 10 <sup>-2</sup> |
|              | 12(13)-EpOME         | 4.49 10 <sup>2</sup>                 | 2.00 10 <sup>2</sup> | 3.99 10 <sup>1</sup> | 2.00 10 <sup>1</sup> | 3.99 10 <sup>0</sup>  | 9.98 10 <sup>-1</sup> | 4.99 10 <sup>-1</sup> | 2.50 10 <sup>-1</sup> | 1.25 10 <sup>-1</sup> | 4.99 10 <sup>-2</sup> |
|              | 9,10-DiHOME          | 2.16 10 <sup>3</sup>                 | 9.62 10 <sup>2</sup> | 1.92 10 <sup>2</sup> | 9.62 10 <sup>1</sup> | 1.92 10 <sup>1</sup>  | 4.81 10 <sup>0</sup>  | 2.40 10 <sup>0</sup>  | 1.20 10 <sup>0</sup>  | 6.01 10 <sup>-1</sup> | 2.40 10 <sup>-1</sup> |
| 12,13-DiHOME | 2.16 10 <sup>3</sup> | 9.62 10 <sup>2</sup>                 | 1.92 10 <sup>2</sup> | 9.62 10 <sup>1</sup> | 1.92 10 <sup>1</sup> | 4.81 10 <sup>0</sup>  | 2.40 10 <sup>0</sup>  | 1.20 10 <sup>0</sup>  | 6.01 10 <sup>-1</sup> | 2.40 10 <sup>-1</sup> |                       |
| 12(13)-EpODE | 2.20 10 <sup>2</sup> | 9.79 10 <sup>1</sup>                 | 1.96 10 <sup>1</sup> | 9.79 10 <sup>0</sup> | 1.96 10 <sup>0</sup> | 4.89 10 <sup>-1</sup> | 2.45 10 <sup>-1</sup> | 1.22 10 <sup>-1</sup> | 6.12 10 <sup>-2</sup> | 2.45 10 <sup>-2</sup> |                       |
| DGLA         | PGD <sub>1</sub>     | 4.47 10 <sup>2</sup>                 | 1.99 10 <sup>2</sup> | 3.97 10 <sup>1</sup> | 1.99 10 <sup>1</sup> | 3.97 10 <sup>0</sup>  | 9.93 10 <sup>-1</sup> | 4.96 10 <sup>-1</sup> | 2.48 10 <sup>-1</sup> | 1.24 10 <sup>-1</sup> | 4.96 10 <sup>-2</sup> |
|              | PGE <sub>1</sub>     | 6.30 10 <sup>2</sup>                 | 2.80 10 <sup>2</sup> | 5.60 10 <sup>1</sup> | 2.80 10 <sup>1</sup> | 5.60 10 <sup>0</sup>  | 1.40 10 <sup>0</sup>  | 7.00 10 <sup>-1</sup> | 3.50 10 <sup>-1</sup> | 1.75 10 <sup>-1</sup> | 7.00 10 <sup>-2</sup> |
|              | 8-HETrE              | 4.49 10 <sup>2</sup>                 | 2.00 10 <sup>2</sup> | 3.99 10 <sup>1</sup> | 2.00 10 <sup>1</sup> | 3.99 10 <sup>0</sup>  | 9.98 10 <sup>-1</sup> | 4.99 10 <sup>-1</sup> | 2.50 10 <sup>-1</sup> | 1.25 10 <sup>-1</sup> | 4.99 10 <sup>-2</sup> |
|              | 15-HETrE             | 4.52 10 <sup>2</sup>                 | 2.01 10 <sup>2</sup> | 4.02 10 <sup>1</sup> | 2.01 10 <sup>1</sup> | 4.02 10 <sup>0</sup>  | 1.00 10 <sup>0</sup>  | 5.02 10 <sup>-1</sup> | 2.51 10 <sup>-1</sup> | 1.26 10 <sup>-1</sup> | 5.02 10 <sup>-2</sup> |
| ALA          | 9-HOTrE              | 2.26 10 <sup>2</sup>                 | 1.01 10 <sup>2</sup> | 2.01 10 <sup>1</sup> | 1.01 10 <sup>1</sup> | 2.01 10 <sup>0</sup>  | 5.03 10 <sup>-1</sup> | 2.51 10 <sup>-1</sup> | 1.26 10 <sup>-1</sup> | 6.28 10 <sup>-2</sup> | 2.51 10 <sup>-2</sup> |
|              | 13-HOTrE             | 1.35 10 <sup>2</sup>                 | 5.98 10 <sup>1</sup> | 1.20 10 <sup>1</sup> | 5.98 10 <sup>0</sup> | 1.20 10 <sup>0</sup>  | 2.99 10 <sup>-1</sup> | 1.49 10 <sup>-1</sup> | 7.47 10 <sup>-2</sup> | 3.74 10 <sup>-2</sup> | 1.49 10 <sup>-2</sup> |
|              | 9-KOTrE              | 2.28 10 <sup>2</sup>                 | 1.01 10 <sup>2</sup> | 2.02 10 <sup>1</sup> | 1.01 10 <sup>1</sup> | 2.02 10 <sup>0</sup>  | 5.06 10 <sup>-1</sup> | 2.53 10 <sup>-1</sup> | 1.27 10 <sup>-1</sup> | 6.33 10 <sup>-2</sup> | 2.53 10 <sup>-2</sup> |

| PUFA             | Compound               | Calibration level concentration (nM) |                       |                       |                       |                       |                       |                       |                       |                       |                       |
|------------------|------------------------|--------------------------------------|-----------------------|-----------------------|-----------------------|-----------------------|-----------------------|-----------------------|-----------------------|-----------------------|-----------------------|
|                  |                        | 10                                   | 9                     | 8                     | 7                     | 6                     | 5                     | 4                     | 3                     | 2                     | 1                     |
| EPA              | PGD <sub>3</sub>       | 4.49 10 <sup>-2</sup>                | 2.00 10 <sup>-2</sup> | 3.99 10 <sup>-1</sup> | 2.00 10 <sup>-1</sup> | 3.99 10 <sup>0</sup>  | 9.99 10 <sup>-1</sup> | 4.99 10 <sup>-1</sup> | 2.50 10 <sup>-1</sup> | 1.25 10 <sup>-1</sup> | 4.99 10 <sup>-2</sup> |
|                  | PGE <sub>3</sub>       | 2.72 10 <sup>-2</sup>                | 1.21 10 <sup>-2</sup> | 2.42 10 <sup>-1</sup> | 1.21 10 <sup>-1</sup> | 2.42 10 <sup>0</sup>  | 6.05 10 <sup>-1</sup> | 3.02 10 <sup>-1</sup> | 1.51 10 <sup>-1</sup> | 7.56 10 <sup>-2</sup> | 3.02 10 <sup>-2</sup> |
|                  | LTB <sub>5</sub>       | 4.49 10 <sup>-2</sup>                | 2.00 10 <sup>-2</sup> | 3.99 10 <sup>-1</sup> | 2.00 10 <sup>-1</sup> | 3.99 10 <sup>0</sup>  | 9.99 10 <sup>-1</sup> | 4.99 10 <sup>-1</sup> | 2.50 10 <sup>-1</sup> | 1.25 10 <sup>-1</sup> | 4.99 10 <sup>-2</sup> |
|                  | 5-HEPE                 | 6.33 10 <sup>-2</sup>                | 2.81 10 <sup>-2</sup> | 5.63 10 <sup>-1</sup> | 2.81 10 <sup>-1</sup> | 5.63 10 <sup>0</sup>  | 1.41 10 <sup>0</sup>  | 7.03 10 <sup>-1</sup> | 3.52 10 <sup>-1</sup> | 1.76 10 <sup>-1</sup> | 7.03 10 <sup>-2</sup> |
|                  | 8-HEPE                 | 1.07 10 <sup>-3</sup>                | 4.75 10 <sup>-2</sup> | 9.49 10 <sup>-1</sup> | 4.75 10 <sup>-1</sup> | 9.49 10 <sup>0</sup>  | 2.37 10 <sup>0</sup>  | 1.19 10 <sup>0</sup>  | 5.93 10 <sup>-1</sup> | 2.97 10 <sup>-1</sup> | 1.19 10 <sup>-1</sup> |
|                  | 9-HEPE                 | 1.07 10 <sup>-3</sup>                | 4.77 10 <sup>-2</sup> | 9.54 10 <sup>-1</sup> | 4.77 10 <sup>-1</sup> | 9.54 10 <sup>0</sup>  | 2.39 10 <sup>0</sup>  | 1.19 10 <sup>0</sup>  | 5.97 10 <sup>-1</sup> | 2.98 10 <sup>-1</sup> | 1.19 10 <sup>-1</sup> |
|                  | 11-HEPE                | 1.03 10 <sup>-3</sup>                | 4.57 10 <sup>-2</sup> | 9.14 10 <sup>-1</sup> | 4.57 10 <sup>-1</sup> | 9.14 10 <sup>0</sup>  | 2.29 10 <sup>0</sup>  | 1.14 10 <sup>0</sup>  | 5.71 10 <sup>-1</sup> | 2.86 10 <sup>-1</sup> | 1.14 10 <sup>-1</sup> |
|                  | 12-HEPE                | 1.04 10 <sup>-3</sup>                | 4.62 10 <sup>-2</sup> | 9.24 10 <sup>-1</sup> | 4.62 10 <sup>-1</sup> | 9.24 10 <sup>0</sup>  | 2.31 10 <sup>0</sup>  | 1.16 10 <sup>0</sup>  | 5.78 10 <sup>-1</sup> | 2.89 10 <sup>-1</sup> | 1.16 10 <sup>-1</sup> |
|                  | 15-HEPE                | 1.02 10 <sup>-3</sup>                | 4.52 10 <sup>-2</sup> | 9.04 10 <sup>-1</sup> | 4.52 10 <sup>-1</sup> | 9.04 10 <sup>0</sup>  | 2.26 10 <sup>0</sup>  | 1.13 10 <sup>0</sup>  | 5.65 10 <sup>-1</sup> | 2.83 10 <sup>-1</sup> | 1.13 10 <sup>-1</sup> |
|                  | 18-HEPE                | 1.02 10 <sup>-3</sup>                | 4.52 10 <sup>-2</sup> | 9.04 10 <sup>-1</sup> | 4.52 10 <sup>-1</sup> | 9.04 10 <sup>0</sup>  | 2.26 10 <sup>0</sup>  | 1.13 10 <sup>0</sup>  | 5.65 10 <sup>-1</sup> | 2.83 10 <sup>-1</sup> | 1.13 10 <sup>-1</sup> |
|                  | 14(15)-EpETE           | 2.26 10 <sup>-2</sup>                | 1.00 10 <sup>-2</sup> | 2.01 10 <sup>-1</sup> | 1.00 10 <sup>-1</sup> | 2.01 10 <sup>0</sup>  | 5.02 10 <sup>-1</sup> | 2.51 10 <sup>-1</sup> | 1.26 10 <sup>-1</sup> | 6.28 10 <sup>-2</sup> | 2.51 10 <sup>-2</sup> |
|                  | 17(18)-EpETE           | 2.26 10 <sup>-2</sup>                | 1.00 10 <sup>-2</sup> | 2.01 10 <sup>-1</sup> | 1.00 10 <sup>-1</sup> | 2.01 10 <sup>0</sup>  | 5.02 10 <sup>-1</sup> | 2.51 10 <sup>-1</sup> | 1.26 10 <sup>-1</sup> | 6.28 10 <sup>-2</sup> | 2.51 10 <sup>-2</sup> |
|                  | 14,15-DiHETE           | 2.25 10 <sup>-2</sup>                | 9.99 10 <sup>-1</sup> | 2.00 10 <sup>-1</sup> | 9.99 10 <sup>0</sup>  | 2.00 10 <sup>0</sup>  | 4.99 10 <sup>-1</sup> | 2.50 10 <sup>-1</sup> | 1.25 10 <sup>-1</sup> | 6.24 10 <sup>-2</sup> | 2.50 10 <sup>-2</sup> |
|                  | 17,18-DiHETE           | 2.25 10 <sup>-2</sup>                | 9.99 10 <sup>-1</sup> | 2.00 10 <sup>-1</sup> | 9.99 10 <sup>0</sup>  | 2.00 10 <sup>0</sup>  | 4.99 10 <sup>-1</sup> | 2.50 10 <sup>-1</sup> | 1.25 10 <sup>-1</sup> | 6.24 10 <sup>-2</sup> | 2.50 10 <sup>-2</sup> |
|                  | LXA <sub>5</sub>       | 1.34 10 <sup>-2</sup>                | 5.93 10 <sup>-1</sup> | 1.19 10 <sup>-1</sup> | 5.93 10 <sup>0</sup>  | 1.19 10 <sup>0</sup>  | 2.97 10 <sup>-1</sup> | 1.48 10 <sup>-1</sup> | 7.42 10 <sup>-2</sup> | 3.71 10 <sup>-2</sup> | 1.48 10 <sup>-2</sup> |
| DHA              | 8-HDoHE                | 4.49 10 <sup>-2</sup>                | 2.00 10 <sup>-2</sup> | 3.99 10 <sup>-1</sup> | 2.00 10 <sup>-1</sup> | 3.99 10 <sup>0</sup>  | 9.99 10 <sup>-1</sup> | 4.99 10 <sup>-1</sup> | 2.50 10 <sup>-1</sup> | 1.25 10 <sup>-1</sup> | 4.99 10 <sup>-2</sup> |
|                  | 11-HDoHE               | 2.69 10 <sup>-2</sup>                | 1.20 10 <sup>-2</sup> | 2.39 10 <sup>-1</sup> | 1.20 10 <sup>-1</sup> | 2.39 10 <sup>0</sup>  | 5.98 10 <sup>-1</sup> | 2.99 10 <sup>-1</sup> | 1.49 10 <sup>-1</sup> | 7.47 10 <sup>-2</sup> | 2.99 10 <sup>-2</sup> |
|                  | 14-HDoHE               | 2.69 10 <sup>-2</sup>                | 1.20 10 <sup>-2</sup> | 2.39 10 <sup>-1</sup> | 1.20 10 <sup>-1</sup> | 2.39 10 <sup>0</sup>  | 5.98 10 <sup>-1</sup> | 2.99 10 <sup>-1</sup> | 1.49 10 <sup>-1</sup> | 7.47 10 <sup>-2</sup> | 2.99 10 <sup>-2</sup> |
|                  | 17-HDoHE               | 2.69 10 <sup>-2</sup>                | 1.20 10 <sup>-2</sup> | 2.39 10 <sup>-1</sup> | 1.20 10 <sup>-1</sup> | 2.39 10 <sup>0</sup>  | 5.98 10 <sup>-1</sup> | 2.99 10 <sup>-1</sup> | 1.49 10 <sup>-1</sup> | 7.47 10 <sup>-2</sup> | 2.99 10 <sup>-2</sup> |
|                  | 16(17)-EpDPE           | 2.25 10 <sup>-2</sup>                | 9.99 10 <sup>-1</sup> | 2.00 10 <sup>-1</sup> | 9.99 10 <sup>0</sup>  | 2.00 10 <sup>0</sup>  | 4.99 10 <sup>-1</sup> | 2.50 10 <sup>-1</sup> | 1.25 10 <sup>-1</sup> | 6.24 10 <sup>-2</sup> | 2.50 10 <sup>-2</sup> |
|                  | 19(20)-EpDPE           | 2.25 10 <sup>-2</sup>                | 9.99 10 <sup>-1</sup> | 2.00 10 <sup>-1</sup> | 9.99 10 <sup>0</sup>  | 2.00 10 <sup>0</sup>  | 4.99 10 <sup>-1</sup> | 2.50 10 <sup>-1</sup> | 1.25 10 <sup>-1</sup> | 6.24 10 <sup>-2</sup> | 2.50 10 <sup>-2</sup> |
|                  | 10,17-DiHDoHE          | 2.70 10 <sup>-2</sup>                | 1.20 10 <sup>-2</sup> | 2.40 10 <sup>-1</sup> | 1.20 10 <sup>-1</sup> | 2.40 10 <sup>0</sup>  | 5.99 10 <sup>-1</sup> | 3.00 10 <sup>-1</sup> | 1.50 10 <sup>-1</sup> | 7.49 10 <sup>-2</sup> | 3.00 10 <sup>-2</sup> |
|                  | 19,20-DiHDPA           | 6.31 10 <sup>-2</sup>                | 2.80 10 <sup>-2</sup> | 5.61 10 <sup>-1</sup> | 2.80 10 <sup>-1</sup> | 5.61 10 <sup>0</sup>  | 1.40 10 <sup>0</sup>  | 7.01 10 <sup>-1</sup> | 3.50 10 <sup>-1</sup> | 1.75 10 <sup>-1</sup> | 7.01 10 <sup>-2</sup> |
|                  | RvD <sub>1</sub>       | 2.70 10 <sup>-2</sup>                | 1.20 10 <sup>-2</sup> | 2.40 10 <sup>-1</sup> | 1.20 10 <sup>-1</sup> | 2.40 10 <sup>0</sup>  | 6.00 10 <sup>-1</sup> | 3.00 10 <sup>-1</sup> | 1.50 10 <sup>-1</sup> | 7.50 10 <sup>-2</sup> | 3.00 10 <sup>-2</sup> |
|                  | 17(R)-RvD <sub>1</sub> | 2.70 10 <sup>-2</sup>                | 1.20 10 <sup>-2</sup> | 2.40 10 <sup>-1</sup> | 1.20 10 <sup>-1</sup> | 2.40 10 <sup>0</sup>  | 6.00 10 <sup>-1</sup> | 3.00 10 <sup>-1</sup> | 1.50 10 <sup>-1</sup> | 7.50 10 <sup>-2</sup> | 3.00 10 <sup>-2</sup> |
|                  | RvD <sub>2</sub>       | 2.70 10 <sup>-2</sup>                | 1.20 10 <sup>-2</sup> | 2.40 10 <sup>-1</sup> | 1.20 10 <sup>-1</sup> | 2.40 10 <sup>0</sup>  | 6.00 10 <sup>-1</sup> | 3.00 10 <sup>-1</sup> | 1.50 10 <sup>-1</sup> | 7.50 10 <sup>-2</sup> | 3.00 10 <sup>-2</sup> |
| RvE <sub>1</sub> | 2.70 10 <sup>-2</sup>  | 1.20 10 <sup>-2</sup>                | 2.40 10 <sup>-1</sup> | 1.20 10 <sup>-1</sup> | 2.40 10 <sup>0</sup>  | 5.99 10 <sup>-1</sup> | 3.00 10 <sup>-1</sup> | 1.50 10 <sup>-1</sup> | 7.49 10 <sup>-2</sup> | 3.00 10 <sup>-2</sup> |                       |
| MA               | LTB <sub>3</sub>       | 4.49 10 <sup>-2</sup>                | 2.00 10 <sup>-2</sup> | 3.99 10 <sup>-1</sup> | 2.00 10 <sup>-1</sup> | 3.99 10 <sup>0</sup>  | 9.99 10 <sup>-1</sup> | 4.99 10 <sup>-1</sup> | 2.50 10 <sup>-1</sup> | 1.25 10 <sup>-1</sup> | 4.99 10 <sup>-2</sup> |
|                  | 5-HETrE                | 4.52 10 <sup>-2</sup>                | 2.01 10 <sup>-2</sup> | 4.02 10 <sup>-1</sup> | 2.01 10 <sup>-1</sup> | 4.02 10 <sup>0</sup>  | 1.00 10 <sup>0</sup>  | 5.02 10 <sup>-1</sup> | 2.51 10 <sup>-1</sup> | 1.26 10 <sup>-1</sup> | 5.02 10 <sup>-2</sup> |

| PUFA | Compound                                                 | Calibration level concentration (nM) |   |   |   |   |   |   |   |   |   |  |                      |
|------|----------------------------------------------------------|--------------------------------------|---|---|---|---|---|---|---|---|---|--|----------------------|
|      |                                                          | 10                                   | 9 | 8 | 7 | 6 | 5 | 4 | 3 | 2 | 1 |  |                      |
| IS   | [ <sup>2</sup> H <sub>4</sub> ]-PGD <sub>2</sub>         |                                      |   |   |   |   |   |   |   |   |   |  | 2.01 10 <sup>2</sup> |
|      | [ <sup>2</sup> H <sub>4</sub> ]-PGE <sub>2</sub>         |                                      |   |   |   |   |   |   |   |   |   |  | 2.01 10 <sup>2</sup> |
|      | [ <sup>2</sup> H <sub>4</sub> ]-6-keto-PGF <sub>1α</sub> |                                      |   |   |   |   |   |   |   |   |   |  | 2.00 10 <sup>2</sup> |
|      | [ <sup>2</sup> H <sub>4</sub> ]-PGB <sub>2</sub>         |                                      |   |   |   |   |   |   |   |   |   |  | 2.01 10 <sup>2</sup> |
|      | [ <sup>2</sup> H <sub>4</sub> ]-TxB <sub>2</sub>         |                                      |   |   |   |   |   |   |   |   |   |  | 2.00 10 <sup>2</sup> |
|      | [ <sup>2</sup> H <sub>4</sub> ]-LTB <sub>4</sub>         |                                      |   |   |   |   |   |   |   |   |   |  | 2.00 10 <sup>2</sup> |
|      | [ <sup>2</sup> H <sub>8</sub> ]-5-HETE                   |                                      |   |   |   |   |   |   |   |   |   |  | 2.01 10 <sup>2</sup> |
|      | [ <sup>2</sup> H <sub>8</sub> ]-15-HETE                  |                                      |   |   |   |   |   |   |   |   |   |  | 2.01 10 <sup>2</sup> |
|      | [ <sup>2</sup> H <sub>6</sub> ]-20-HETE                  |                                      |   |   |   |   |   |   |   |   |   |  | 1.99 10 <sup>2</sup> |
|      | [ <sup>2</sup> H <sub>7</sub> ]-5-KETE                   |                                      |   |   |   |   |   |   |   |   |   |  | 2.00 10 <sup>2</sup> |
|      | [ <sup>2</sup> H <sub>11</sub> ]-11(12)-EpETrE           |                                      |   |   |   |   |   |   |   |   |   |  | 1.99 10 <sup>2</sup> |
|      | [ <sup>2</sup> H <sub>11</sub> ]-14,15-DiHETrE           |                                      |   |   |   |   |   |   |   |   |   |  | 2.00 10 <sup>2</sup> |
|      | [ <sup>2</sup> H <sub>4</sub> ]-9-HODE                   |                                      |   |   |   |   |   |   |   |   |   |  | 2.00 10 <sup>2</sup> |
|      | [ <sup>2</sup> H <sub>4</sub> ]-9(10)-EpOME              |                                      |   |   |   |   |   |   |   |   |   |  | 2.00 10 <sup>2</sup> |
|      | [ <sup>2</sup> H <sub>4</sub> ]-9,10-DiHOME              |                                      |   |   |   |   |   |   |   |   |   |  | 2.01 10 <sup>2</sup> |
| TS   | CUDA                                                     |                                      |   |   |   |   |   |   |   |   |   |  | 4.41 10 <sup>2</sup> |

**Table E3. Analytical characterization of the standards employed in the lipid mediator mass spectrometry platform.** Analytical external standards are categorized by their parent polyunsaturated fatty acid (PUFA): arachidonic acid (AA), linoleic acid (LA), dihomo- $\gamma$ -linolenic acid (DGLA),  $\alpha$ -linolenic acid (ALA), eicosapentaenoic acid (EPA), docosahexaenoic acid (DHA) and mead acid (MA). In addition, compounds are provided by their analytical use as internal standards (IS) or technical standards (TS). Chromatographic retention time (RT), parent ion, product ion, the internal standard (IS) assigned to each lipid mediator and the on-column injected linear range are reported.

| PUFA | Lipid mediator                                        | RT (min)     | Parent ion [M-H] <sup>-</sup> (m/z) | Product ion (m/z) | IS                                                                         | Linear range (fmol) |
|------|-------------------------------------------------------|--------------|-------------------------------------|-------------------|----------------------------------------------------------------------------|---------------------|
|      | PGD <sub>2</sub>                                      | 6.10         | 351.1                               | 271               | [ <sup>2</sup> H <sub>4</sub> ]-PGD <sub>2</sub>                           | 0.98-3750           |
|      | 11- $\beta$ -PGF <sub>2<math>\alpha</math></sub>      | 5.35         | 353.3                               | 193               | [ <sup>2</sup> H <sub>4</sub> ]-PGD <sub>2</sub>                           | 2.6-2050            |
|      | PGJ <sub>2</sub>                                      | 8.00         | 333                                 | 189               | [ <sup>2</sup> H <sub>4</sub> ]-PGE <sub>2</sub>                           | 0.75-3000           |
|      | 15-deoxy- $\Delta$ <sup>12,14</sup> -PGJ <sub>2</sub> | 11.55        | 315.2                               | 271               | [ <sup>2</sup> H <sub>4</sub> ]-6-keto-PGF <sub>1<math>\alpha</math></sub> | 0.53-4650           |
|      | PGE <sub>2</sub>                                      | 5.85         | 351.2                               | 271               | [ <sup>2</sup> H <sub>4</sub> ]-PGE <sub>2</sub>                           | 1.9-3750            |
|      | PGF <sub>2<math>\alpha</math></sub>                   | 5.75         | 353.3                               | 193               | [ <sup>2</sup> H <sub>4</sub> ]-PGD <sub>2</sub>                           | 1.4-410             |
|      | 6-keto-PGF <sub>1<math>\alpha</math></sub>            | 4.35         | 369.2                               | 163               | [ <sup>2</sup> H <sub>4</sub> ]-6-keto-PGF <sub>1<math>\alpha</math></sub> | 2.6-2050            |
|      | TxB <sub>2</sub>                                      | 5.20 (broad) | 373.2                               | 173               | [ <sup>2</sup> H <sub>4</sub> ]-TxB <sub>2</sub>                           | 0.98-750            |
|      | 12-HHTrE                                              | 10.55        | 279.2                               | 179               | [ <sup>2</sup> H <sub>4</sub> ]-9-HODE                                     | 3.8-150             |
|      | PGB <sub>2</sub>                                      | 8.00         | 333.2                               | 175               | [ <sup>2</sup> H <sub>4</sub> ]-PGB <sub>2</sub>                           | 1.8-7125            |
|      | 8-isoPGE <sub>2</sub>                                 | 5.70         | 351.2                               | 271               | [ <sup>2</sup> H <sub>4</sub> ]-6-keto-PGF <sub>1<math>\alpha</math></sub> | 0.98-150            |
|      | LTB <sub>4</sub>                                      | 9.65         | 335.2                               | 195               | [ <sup>2</sup> H <sub>4</sub> ]-LTB <sub>4</sub>                           | 1.9-3375            |
|      | 6-trans-LTB <sub>4</sub>                              | 9.40         | 335.2                               | 195               | [ <sup>2</sup> H <sub>4</sub> ]-LTB <sub>4</sub>                           | 3.8-1500            |
|      | 20-hydroxy-LTB <sub>4</sub>                           | 4.50         | 351.3                               | 195               | [ <sup>2</sup> H <sub>4</sub> ]-LTB <sub>4</sub>                           | 3.8-1500            |
|      | 20-carboxy-LTB <sub>4</sub>                           | 4.35         | 365.2                               | 195               | [ <sup>2</sup> H <sub>4</sub> ]-LTB <sub>4</sub>                           | 1.9-300             |
|      | 5-HETE                                                | 14.25        | 319.1                               | 115               | [ <sup>2</sup> H <sub>8</sub> ]-5-HETE                                     | 1.8-1425            |
|      | 8-HETE                                                | 13.70        | 319.1                               | 155               | [ <sup>2</sup> H <sub>7</sub> ]-5-KETE                                     | 4.5-15500           |
|      | 9-HETE                                                | 13.90        | 319.2                               | 179               | [ <sup>2</sup> H <sub>8</sub> ]-15-HETE                                    | 4.5-1425            |
|      | 11-HETE                                               | 13.40        | 319.1                               | 167               | [ <sup>2</sup> H <sub>8</sub> ]-15-HETE                                    | 1.8-7125            |
| AA   | 12-HETE                                               | 13.60        | 319.1                               | 179               | [ <sup>2</sup> H <sub>8</sub> ]-15-HETE                                    | 1.8-7125            |
|      | 15-HETE                                               | 12.97        | 319.1                               | 175               | [ <sup>2</sup> H <sub>8</sub> ]-15-HETE                                    | 1.8-7310            |
|      | 20-HETE                                               | 11.85        | 319.3                               | 275               | [ <sup>2</sup> H <sub>6</sub> ]-20-HETE                                    | 42-4725             |
|      | 5-KETE                                                | 15.00        | 317.2                               | 203               | [ <sup>2</sup> H <sub>7</sub> ]-5-KETE                                     | 0.98-1675           |
|      | 12-KETE                                               | 13.85        | 317.2                               | 153               | [ <sup>2</sup> H <sub>7</sub> ]-5-KETE                                     | 15-750              |
|      | 15-KETE                                               | 13.25        | 317.2                               | 113               | [ <sup>2</sup> H <sub>7</sub> ]-5-KETE                                     | 0.98-1675           |
|      | 5(6)-EpETrE                                           | 15.55        | 319.2                               | 191               | [ <sup>2</sup> H <sub>11</sub> ]-11(12)-EpETrE                             | 1.9-1675            |
|      | 8(9)-EpETrE                                           | 15.30        | 319.3                               | 155               | [ <sup>2</sup> H <sub>11</sub> ]-11(12)-EpETrE                             | 3.8-150             |
|      | 11(12)-EpETrE                                         | 15.05        | 319.2                               | 167               | [ <sup>2</sup> H <sub>11</sub> ]-11(12)-EpETrE                             | 0.38-150            |
|      | 14(15)-EpETrE                                         | 14.50        | 319.3                               | 257               | [ <sup>2</sup> H <sub>11</sub> ]-11(12)-EpETrE                             | 3.8-1675            |
|      | 5,6-DiHETrE                                           | 12.15        | 337.3                               | 145               | [ <sup>2</sup> H <sub>11</sub> ]-14,15-DiHETrE                             | 0.38-3375           |
|      | 8,9-DiHETrE                                           | 11.50        | 337.2                               | 127               | [ <sup>2</sup> H <sub>11</sub> ]-14,15-DiHETrE                             | 0.98-3375           |
|      | 11,12-DiHETrE                                         | 11.00        | 337.3                               | 167               | [ <sup>2</sup> H <sub>11</sub> ]-14,15-DiHETrE                             | 0.38-300            |
|      | 14,15-DiHETrE                                         | 10.50        | 337.3                               | 207               | [ <sup>2</sup> H <sub>11</sub> ]-14,15-DiHETrE                             | 0.98-3375           |
|      | 5,6-DiHETE                                            | 11.85        | 335.2                               | 115               | [ <sup>2</sup> H <sub>11</sub> ]-14,15-DiHETrE                             | 1.9-750             |
|      | 5,15-DiHETE                                           | 9.28         | 335.3                               | 255               | [ <sup>2</sup> H <sub>11</sub> ]-14,15-DiHETrE                             | 1.9-750             |
|      | 8,15-DiHETE                                           | 8.94         | 335.3                               | 155               | [ <sup>2</sup> H <sub>11</sub> ]-14,15-DiHETrE                             | 2.3-975             |
|      | LXA <sub>4</sub>                                      | 6.85         | 351.3                               | 115               | [ <sup>2</sup> H <sub>8</sub> ]-5-HETE                                     | 0.30-1010           |
|      | LXB <sub>4</sub>                                      | 6.10         | 351.3                               | 221               | [ <sup>2</sup> H <sub>4</sub> ]-9,10-DiHOME                                | 9.0-975             |

|                  | Lipid mediator         | RT (min) | Parent ion [M-H] <sup>-</sup> (m/z) | Product ion (m/z)                              | IS                                                       | Linear range (fmol) |
|------------------|------------------------|----------|-------------------------------------|------------------------------------------------|----------------------------------------------------------|---------------------|
| LA               | 9-HODE                 | 12.75    | 295.3                               | 171                                            | [ <sup>2</sup> H <sub>4</sub> ]-9-HODE                   | 3.8-1500            |
|                  | 13-HODE                | 12.60    | 295.2                               | 195                                            | [ <sup>2</sup> H <sub>4</sub> ]-9-HODE                   | 3.8-1500            |
|                  | 9-KODE                 | 13.40    | 293.2                               | 185                                            | [ <sup>2</sup> H <sub>4</sub> ]-9(10)-EpOME              | 1.9-150             |
|                  | 13-KODE                | 13.00    | 293.2                               | 113                                            | [ <sup>2</sup> H <sub>4</sub> ]-9(10)-EpOME              | 0.98-150            |
|                  | 9,10,13-TriHOME        | 5.75     | 329.1                               | 139                                            | [ <sup>2</sup> H <sub>4</sub> ]-PGE <sub>2</sub>         | 4.5-135             |
|                  | 9,12,13-TriHOME        | 5.65     | 329.1                               | 211                                            | [ <sup>2</sup> H <sub>4</sub> ]-PGE <sub>2</sub>         | 1.8-135             |
|                  | EKODE                  | 11.20    | 309.2                               | 291                                            | [ <sup>2</sup> H <sub>4</sub> ]-9(10)-EpOME              | 0.98-1675           |
|                  | 9(10)-EpOME            | 14.60    | 295.2                               | 171                                            | [ <sup>2</sup> H <sub>4</sub> ]-9(10)-EpOME              | 1.9-3375            |
|                  | 12(13)-EpOME           | 14.35    | 295.2                               | 195                                            | [ <sup>2</sup> H <sub>4</sub> ]-9(10)-EpOME              | 3.8-3375            |
|                  | 9,10-DiHOME            | 10.25    | 313.2                               | 201                                            | [ <sup>2</sup> H <sub>4</sub> ]-9,10-DiHOME              | 1.8-712.5           |
|                  | 12,13-DiHOME           | 9.85     | 313.1                               | 183                                            | [ <sup>2</sup> H <sub>4</sub> ]-9,10-DiHOME              | 1.8-7200            |
| 12(13)-EpODE     | 13.10                  | 293.2    | 183                                 | [ <sup>2</sup> H <sub>4</sub> ]-9(10)-EpOME    | 1.8-1650                                                 |                     |
| DGLA             | PGD <sub>1</sub>       | 6.15     | 353.3                               | 317.3                                          | [ <sup>2</sup> H <sub>4</sub> ]-6-keto-PGF <sub>1α</sub> | 3.75-3375           |
|                  | PGE <sub>1</sub>       | 6.05     | 353.3                               | 317.3                                          | [ <sup>2</sup> H <sub>4</sub> ]-6-keto-PGF <sub>1α</sub> | 1.35-4725           |
|                  | 8-HETrE                | 14.29    | 321.3                               | 157                                            | [ <sup>2</sup> H <sub>8</sub> ]-5-HETE                   | 3.75-300            |
|                  | 15-HETrE               | 13.85    | 321.3                               | 221                                            | [ <sup>2</sup> H <sub>8</sub> ]-15-HETE                  | 1.9-1500            |
| ALA              | 9-HOTrE                | 11.25    | 293.2                               | 171                                            | [ <sup>2</sup> H <sub>11</sub> ]-14,15-DiHETrE           | 0.19-150            |
|                  | 13-HOTrE               | 11.40    | 293.2                               | 195                                            | [ <sup>2</sup> H <sub>11</sub> ]-14,15-DiHETrE           | 9.0-90              |
|                  | 9-KOTrE                | 11.88    | 291.2                               | 185                                            | [ <sup>2</sup> H <sub>4</sub> ]-9(10)-EpOME              | 3.8-1675            |
| EPA              | PGD <sub>3</sub>       | 5.25     | 349.3                               | 269                                            | [ <sup>2</sup> H <sub>4</sub> ]-PGD <sub>2</sub>         | 3.75-3375           |
|                  | PGE <sub>3</sub>       | 5.09     | 349.3                               | 269                                            | [ <sup>2</sup> H <sub>4</sub> ]-PGD <sub>2</sub>         | 0.56-2025           |
|                  | LTB <sub>5</sub>       | 8.25     | 333.2                               | 195                                            | [ <sup>2</sup> H <sub>4</sub> ]-LTB <sub>4</sub>         | 0.98-3375           |
|                  | 5-HEPE                 | 12.65    | 317.3                               | 115                                            | [ <sup>2</sup> H <sub>8</sub> ]-15-HETE                  | 2.6-2100            |
|                  | 8-HEPE                 | 12.15    | 317.1                               | 155                                            | [ <sup>2</sup> H <sub>8</sub> ]-15-HETE                  | 2.3-3550            |
|                  | 9-HEPE                 | 12.30    | 317                                 | 149                                            | [ <sup>2</sup> H <sub>8</sub> ]-15-HETE                  | 2.3-3550            |
|                  | 11-HEPE                | 11.91    | 317                                 | 167                                            | [ <sup>2</sup> H <sub>8</sub> ]-15-HETE                  | 2.3-3375            |
|                  | 12-HEPE                | 12.15    | 317                                 | 179                                            | [ <sup>2</sup> H <sub>8</sub> ]-15-HETE                  | 2.3-3450            |
|                  | 15-HEPE                | 11.80    | 317.1                               | 219                                            | [ <sup>2</sup> H <sub>8</sub> ]-15-HETE                  | 2.3-3375            |
|                  | 18-HEPE                | 11.40    | 317.1                               | 215                                            | [ <sup>2</sup> H <sub>8</sub> ]-15-HETE                  | 2.3-3375            |
|                  | 14(15)-EpETE           | 13.30    | 317.3                               | 207                                            | [ <sup>2</sup> H <sub>7</sub> ]-5-KETE                   | 1.9-1675            |
|                  | 17(18)-EpETE           | 12.90    | 317.3                               | 255                                            | [ <sup>2</sup> H <sub>7</sub> ]-5-KETE                   | 1.9-1675            |
|                  | 14,15-DiHETE           | 9.51     | 335.2                               | 207                                            | [ <sup>2</sup> H <sub>11</sub> ]-14,15-DiHETrE           | 15-1675             |
|                  | 17,18-DiHETE           | 9.20     | 335.2                               | 247                                            | [ <sup>2</sup> H <sub>11</sub> ]-14,15-DiHETrE           | 15-1675             |
|                  | LXA <sub>5</sub>       | 5.80     | 349.1                               | 115                                            | [ <sup>2</sup> H <sub>8</sub> ]-5-HETE                   | 1.2-975             |
| DHA              | 8-HDoHE                | 14.00    | 343.2                               | 189                                            | [ <sup>2</sup> H <sub>8</sub> ]-5-HETE                   | 7.5-1500            |
|                  | 11-HDoHE               | 13.65    | 343.3                               | 149                                            | [ <sup>2</sup> H <sub>8</sub> ]-5-HETE                   | 2.3-2025            |
|                  | 14-HDoHE               | 13.40    | 343.2                               | 281                                            | [ <sup>2</sup> H <sub>8</sub> ]-5-HETE                   | 4.5-2025            |
|                  | 17-HDoHE               | 13.10    | 343.2                               | 281                                            | [ <sup>2</sup> H <sub>7</sub> ]-5-KETE                   | 4.5-900             |
|                  | 16(17)-EpDPE           | 14.75    | 343.3                               | 281                                            | [ <sup>2</sup> H <sub>11</sub> ]-11(12)-EpETrE           | 3.8-750             |
|                  | 19(20)-EpDPE           | 14.30    | 343.2                               | 281                                            | [ <sup>2</sup> H <sub>11</sub> ]-11(12)-EpETrE           | 1.9-150             |
|                  | 10,17-DiHDoHE          | 9.20     | 359.2                               | 153                                            | [ <sup>2</sup> H <sub>11</sub> ]-14,15-DiHETrE           | 2.3-2050            |
|                  | 19,20-DiHDPA           | 10.53    | 361.1                               | 229                                            | [ <sup>2</sup> H <sub>11</sub> ]-14,15-DiHETrE           | 1.4-4750            |
|                  | RvD <sub>1</sub>       | 6.75     | 375.1                               | 141                                            | [ <sup>2</sup> H <sub>11</sub> ]-14,15-DiHETrE           | 2.3-2050            |
|                  | 17(R)-RvD <sub>1</sub> | 6.85     | 375.1                               | 141                                            | [ <sup>2</sup> H <sub>11</sub> ]-14,15-DiHETrE           | 4.5-2050            |
|                  | RvD <sub>2</sub>       | 6.15     | 375.2                               | 175                                            | [ <sup>2</sup> H <sub>11</sub> ]-14,15-DiHETrE           | 18-2050             |
| RvE <sub>1</sub> | 4.40                   | 349.1    | 195                                 | [ <sup>2</sup> H <sub>11</sub> ]-14,15-DiHETrE | 4.5-2050                                                 |                     |
| MA               | LTB <sub>3</sub>       | 11.00    | 337.2                               | 195                                            | [ <sup>2</sup> H <sub>4</sub> ]-LTB <sub>4</sub>         | 1.9-3375            |
|                  | 5-HETrE                | 16.05    | 321.3                               | 205                                            | [ <sup>2</sup> H <sub>8</sub> ]-5-HETE                   | 0.98-300            |

|    | <b>Lipid mediator</b>                                    | <b>RT<br/>(min)</b> | <b>Parent ion<br/>[M-H]<sup>-</sup><br/>(m/z)</b> | <b>Product<br/>ion<br/>(m/z)</b> | <b>IS</b> | <b>Linear<br/>range (fmol)</b> |
|----|----------------------------------------------------------|---------------------|---------------------------------------------------|----------------------------------|-----------|--------------------------------|
|    | [ <sup>2</sup> H <sub>4</sub> ]-PGD <sub>2</sub>         | 6.10                | 355.3                                             | 193                              |           |                                |
|    | [ <sup>2</sup> H <sub>4</sub> ]-PGE <sub>2</sub>         | 5.85                | 355.3                                             | 275                              |           |                                |
|    | [ <sup>2</sup> H <sub>4</sub> ]-6-keto-PGF <sub>1α</sub> | 4.35                | 373.2                                             | 167                              |           |                                |
|    | [ <sup>2</sup> H <sub>4</sub> ]-PGB <sub>2</sub>         | 8.00                | 337.2                                             | 179                              |           |                                |
|    | [ <sup>2</sup> H <sub>4</sub> ]-TxB <sub>2</sub>         | 5.22 (broad)        | 373.2                                             | 173                              |           |                                |
|    | [ <sup>2</sup> H <sub>4</sub> ]-LTB <sub>4</sub>         | 9.60                | 339.3                                             | 153                              |           |                                |
|    | [ <sup>2</sup> H <sub>8</sub> ]-5-HETE                   | 14.15               | 327.2                                             | 116                              |           |                                |
|    | [ <sup>2</sup> H <sub>8</sub> ]-15-HETE                  | 12.85               | 327.3                                             | 182                              |           |                                |
| IS | [ <sup>2</sup> H <sub>6</sub> ]-20-HETE                  | 11.80               | 325.3                                             | 281                              |           |                                |
|    | [ <sup>2</sup> H <sub>7</sub> ]-5-KETE                   | 14.95               | 324.2                                             | 210                              |           |                                |
|    | [ <sup>2</sup> H <sub>11</sub> ]-11(12)-<br>EpETrE       | 14.95               | 330.3                                             | 167                              |           |                                |
|    | [ <sup>2</sup> H <sub>11</sub> ]-14,15-<br>DiHETrE       | 10.40               | 348.3                                             | 207                              |           |                                |
|    | [ <sup>2</sup> H <sub>4</sub> ]-9-HODE                   | 12.70               | 299.3                                             | 172                              |           |                                |
|    | [ <sup>2</sup> H <sub>4</sub> ]-9(10)-EpOME              | 14.55               | 299.1                                             | 172                              |           |                                |
|    | [ <sup>2</sup> H <sub>4</sub> ]-9,10-DiHOME              | 10.17               | 317.2                                             | 203                              |           |                                |
| TS | CUDA                                                     | 9.70                | 339.3                                             | 214                              |           |                                |



**Table E4. Average concentration ± standard deviation of lipid mediators in BALF.** Compounds are categorized by their parent polyunsaturated fatty acid (PUFA): arachidonic acid (AA), linoleic acid (LA), dihomo- $\gamma$ -linolenic acid (DGLA),  $\alpha$ -linolenic acid (ALA), eicosapentaenoic acid (EPA), docosahexaenoic acid (DHA) and mead acid (MA). The synthetic pathway is provided with the color-coding scheme shown in Figure S1. Units are in pM, except for CysLTs (ng/mL). LOD indicates that values were below the method limit of detection.

| Lipid mediator (pM)        | PUFA | Pathway | Male       |           |            |           | Female     |            |           |            |
|----------------------------|------|---------|------------|-----------|------------|-----------|------------|------------|-----------|------------|
|                            |      |         | Healthy    | Smokers   | COPD       | COPD ExS  | Healthy    | Smokers    | COPD      | COPD ExS   |
| PGD2                       | AA   | COX     | 12.3±8.61  | 79.1±60.3 | 82.6±46.4  | 50.9±21.9 | 14.0±12.4  | 84.5±117   | 109±88.4  | 56.6±70.3  |
| 11- $\beta$ -PGF2 $\alpha$ | AA   | COX     | 13.6±6.10  | 22.1±10.5 | 16.7±10.1  | LOD       | 12.9±3.74  | 20.2±10.5  | 17.0±5.13 | LOD        |
| PGJ2                       | AA   | COX     | 9.14±6.86  | 6.47±3.08 | 6.98±3.37  | LOD       | 7.03±1.65  | 5.53±2.06  | 7.56±4.97 | 7.81±4.28  |
| PGE2                       | AA   | COX     | 9.71±4.41  | 43.8±31.1 | 51.7±39.7  | 26.8±20.4 | 15.1±6.23  | 36.7±43.7  | 42.2±25.5 | 17.2±14.0  |
| PGF2 $\alpha$              | AA   | COX     | LOD        | 48.7±32.7 | 47.8±34.0  | 30.3±5.29 | 21.8±1.62  | 37.7±26.2  | 52.1±36.0 | LOD        |
| TxB2                       | AA   | COX     | 31.4±27.8  | 268±252   | 276±198    | 133±130   | 55.6±55.4  | 183±145    | 384±276   | 75.2±67.9  |
| 12-HHTrE                   | AA   | COX     | 35.0±21.6  | 153±153   | 158±135    | 158±110   | 62.2±62.7  | 108±91.8   | 261±181   | 60.9±42.3  |
| LTB4                       | AA   | 5-LOX   | 40.0±33.3  | 518±508   | 622±569    | 107±121   | 81.1±95.6  | 449±498    | 425±357   | 60.0±33.2  |
| 6- <i>trans</i> -LTB4      | AA   | 5-LOX   | 19.4±10.6  | 132±105   | 166±145    | 54.0±43.0 | 51.2±47.7  | 126±118    | 146±115   | 24.9±19.6  |
| CysLTs                     | AA   | 5-LOX   | 53.4±19.5  | 64.6±29.7 | 62.9±24.0  | 55.9±9.69 | 55.8±16.8  | 69.7±26.3  | 56.9±13.2 | 52.2±17.1  |
| 5-HETE                     | AA   | 5-LOX   | 89.8±60.4  | 1040±987  | 1361±1540  | 421±502   | 235±330    | 852±958    | 1310±1390 | 207±160    |
| 5-KETE                     | AA   | 5-LOX   | 23.6±19.7  | 90.6±80.9 | 122±110    | 42.1±30.7 | 39.8±51.3  | 57.4±33.5  | 128±99.1  | 34.6±23.1  |
| 11-HETE                    | AA   | ROS     | 7.59±8.09  | 13.5±11.9 | 13.5±9.78  | 8.09±3.57 | 6.27±3.81  | 12.1±11.02 | 19.0±7.23 | 7.49±1.05  |
| 12-HETE                    | AA   | 12-LOX  | 68.2±65.5  | 139±132   | 92.7±82.6  | 188±185   | 137±123    | 139±199    | 165±180   | 87.6±107   |
| 15-HETE                    | AA   | 15-LOX  | 440±424    | 1140±917  | 1020±963   | 1300±1090 | 732±562    | 1040±1330  | 1480±1400 | 521±474    |
| 15-KETE                    | AA   | 15-LOX  | 100±71.7   | 329±203   | 320±223    | 235±180   | 163±102    | 396±602    | 275±140   | 107±77.2   |
| 5(6)-EpETrE                | AA   | CYP     | 11.7±5.01  | 28.4±19.5 | 30.4±17.9  | 18.3±3.89 | 12.8±5.81  | 22.0±9.84  | 23.1±9.23 | 15.8±10.0  |
| 11(12)-EpETrE              | AA   | CYP     | 6.96±3.08  | 19.4±10.1 | 19.8±11.3  | 7.75±1.90 | 7.43±3.75  | 13.7±6.01  | 14.5±8.47 | 6.21±2.19  |
| 11,12-DiHETrE              | AA   | EH      | 3.13±0.150 | 7.38±5.16 | 5.10±1.11  | LOD       | 3.25±0.460 | 6.29±2.27  | 5.11±2.01 | 2.98±0.180 |
| 14,15-DiHETrE              | AA   | EH      | 6.11±0.910 | 9.5±3.53  | 8.03±0.890 | LOD       | 6.81±1.63  | 7.45±1.69  | 8.42±1.82 | 6.54±1.68  |
| 5,6-DiHETE                 | AA   | EH      | 8.04±2.12  | 29.3±21.5 | 30.8±23.6  | 11.7±4.28 | 12.0±8.25  | 26.4±28.4  | 29.4±22.7 | 7.06±0.580 |
| 13-HODE                    | LA   | 15-LOX  | 650±571    | 1250±1610 | 911±769    | 1410±1120 | 942±634    | 1090±970   | 1010±853  | 599±383    |
| 13-KODE                    | LA   | 15-LOX  | 277±176    | 291±170   | 284±174    | 286±26.3  | 344±283    | 295±146    | 207±56.3  | 250±143    |
| 9-KODE                     | LA   | NA      | 92.4±86.0  | 62.0±53.8 | 90.6±91.3  | 96.3±48.7 | 93.8±109   | 56.6±39.8  | 74.5±29.8 | 92.9±65.6  |
| 9,10,13-TriHOME            | LA   | NA      | 105±59.8   | 67.5±40.0 | 110±62.3   | 188±54.3  | 106±53.2   | 54.6±16.9  | 127±30.5  | 125±60.6   |

| Lipid mediator (pM) | PUFA | Pathway | Male      |           |           |           | Female    |           |           |           |
|---------------------|------|---------|-----------|-----------|-----------|-----------|-----------|-----------|-----------|-----------|
|                     |      |         | Healthy   | Smokers   | COPD      | COPD ExS  | Healthy   | Smokers   | COPD      | COPD ExS  |
| EKODE               | LA   | ROS     | 197±164   | 129±160   | 166±196   | 223±172   | 197±197   | 79.8±57.8 | 106±63.5  | 217±200   |
| 9(10)-EpOME         | LA   | CYP     | 2570±1230 | 1910±866  | 2280±811  | 3070±1020 | 2500±1230 | 1340±717  | 2950±1190 | 2360±846  |
| 12(13)-EpOME        | LA   | CYP     | 2350±1090 | 2050±872  | 2310±669  | 2800±870  | 2320±1080 | 1470±709  | 2940±1040 | 2180±764  |
| 9,10-DiHOME         | LA   | EH      | 337±174   | 491±243   | 461±161   | 516±250   | 384±251   | 378±208   | 547±195   | 287±112   |
| 12,13-DiHOME        | LA   | EH      | 313±180   | 422±210   | 412±163   | 500±273   | 359±278   | 330±219   | 499±239   | 266±127   |
| PGE1                | DGLA | COX     | 3.63±1.32 | 4.59±2.33 | 4.97±2.08 | 2.97±1.29 | 3.73±1.17 | 4.41±1.73 | 5.15±2.14 | 3.01±1.44 |
| 15-HETrE            | DGLA | 15-LOX  | 49.4±50.8 | 94.8±91.0 | 86.7±94.7 | 175±201   | 85.9±60.7 | 85.1±96.8 | 153±185   | 55.3±35.8 |
| 13-HOTrE            | ALA  | 15-LOX  | 64.8±53.7 | 68.0±77.3 | 47.9±23.3 | 73.0±51.0 | 52.1±39.9 | 73.5±125  | 48.6±23.4 | 44.5±19.7 |
| LTB5                | EPA  | 5-LOX   | 3.17±2.45 | 15.8±13.7 | 19.2±18.9 | 3.61±2.84 | 5.34±3.77 | 18.2±19.1 | 24.6±47.4 | 2.94±1.11 |
| 5-HEPE              | EPA  | 5-LOX   | 18.0±4.63 | 89.8±67.8 | 97.2±97.1 | 20.9±8.18 | 45.7±31.3 | 93.0±95.2 | 186±408   | 43.1±13.8 |
| 12-HEPE             | EPA  | 12-LOX  | 16.4±6.65 | 24.9±14.9 | 14.3±4.18 | 25.2±21.6 | 26.3±23.0 | 22.4±27.6 | 36.1±40.6 | 18.7±14.2 |
| 15-HEPE             | EPA  | 15-LOX  | 93.9±53.1 | 132±124   | 95.6±66.8 | 170±112   | 151±112   | 159±177   | 224±279   | 92.3±82.7 |
| 14-HDoHE            | DHA  | ROS     | 67.7±62.6 | 82.4±71.5 | 69.9±43.6 | 90.2±63.2 | 113±83.3  | 117±152   | 120±127   | 62.1±62.6 |
| 17-HDoHE            | DHA  | 15-LOX  | 413±207   | 440±351   | 400±226   | 547±340   | 471±302   | 728±895   | 573±489   | 371±255   |
| 5-HETrE             | MA   | 5-LOX   | 11.4±4.52 | 70.7±57.7 | 118±122   | 36.5±28.0 | 15.6±12.4 | 74.0±98.1 | 80.1±62.0 | 10.8±6.89 |

**Table E5. Average concentration ± standard deviation of lipid mediators in serum.** Compounds are categorized by their parent polyunsaturated fatty acid (PUFA): arachidonic acid (AA), linoleic acid (LA), dihomo- $\gamma$ -linolenic acid (DGLA),  $\alpha$ -linoleic acid (ALA), eicosapentaenoic acid (EPA), docosahexaenoic acid (DHA) and mead acid (MA). In addition, the synthetic pathway is provided with the color-coding scheme shown in Figure S1. LOD indicates that values were below the method limit of detection.

| Lipid mediator (nM)                                   | PUFA | Pathway | Male        |             |             |             | Female      |             |             |             |
|-------------------------------------------------------|------|---------|-------------|-------------|-------------|-------------|-------------|-------------|-------------|-------------|
|                                                       |      |         | Healthy     | Smokers     | COPD        | COPD ExS    | Healthy     | Smokers     | COPD        | COPD ExS    |
| PGD <sub>2</sub>                                      | AA   | COX     | 0.159±0.168 | 0.240±0.200 | 0.181±0.151 | 0.297±0.253 | 0.227±0.212 | 0.133±0.119 | 0.253±0.334 | 0.084±0.040 |
| PGE <sub>2</sub>                                      | AA   | COX     | 0.200±0.161 | 0.291±0.287 | 0.229±0.209 | 0.364±0.290 | 0.205±0.147 | 0.174±0.149 | 0.234±0.302 | 0.056±0.044 |
| PGF <sub>2<math>\alpha</math></sub>                   | AA   | COX     | 0.129±0.125 | 0.158±0.116 | 0.152±0.104 | 0.185±0.171 | 0.173±0.101 | 0.123±0.124 | 0.209±0.236 | 0.111±0.068 |
| 11- $\beta$ -PGF <sub>2<math>\alpha</math></sub>      | AA   | COX     | 0.110±0.047 | 0.217±0.394 | 0.133±0.072 | 0.128±0.047 | 0.304±0.506 | 0.081±0.042 | 0.192±0.110 | 0.103±0.027 |
| 6-keto-PGF <sub>1<math>\alpha</math></sub>            | AA   | COX     | 0.057±0.055 | 0.060±0.092 | 0.047±0.064 | 0.059±0.055 | 0.058±0.062 | 0.055±0.06  | 0.100±0.083 | 0.043±0.030 |
| PGJ <sub>2</sub>                                      | AA   | COX     | 0.068±0.077 | 0.092±0.114 | 0.165±0.105 | 0.084±0.067 | 0.043±0.059 | 0.086±0.098 | 0.062±0.053 | 0.124±0.154 |
| 15-deoxy- $\Delta$ <sup>12,14</sup> -PGJ <sub>2</sub> | AA   | COX     | 0.126±0.087 | 0.309±0.654 | 0.132±0.048 | 0.104±0.051 | 0.106±0.051 | 0.138±0.067 | 0.124±0.046 | 0.121±0.065 |
| TxB <sub>2</sub>                                      | AA   | COX     | 13.1±14.0   | 14.8±14.8   | 16.4±16.6   | 32.7±30.5   | 16.7±15.8   | 11.0±9.6    | 20.8±27.1   | 6.64±2.30   |
| 12-HHTrE                                              | AA   | COX     | 20.4±20.3   | 18.8±17.8   | 21.6±23.1   | 48.7±45.0   | 23.5±22.3   | 12.8±14.6   | 30.0±37.9   | 10.4±3.75   |
| PGB <sub>2</sub>                                      | AA   | NA      | 0.060±0.038 | 0.187±0.548 | 0.045±0.023 | 0.049±0.003 | 0.052±0.019 | 0.063±0.040 | 0.135±0.147 | 0.080±0.056 |
| LTB <sub>4</sub>                                      | AA   | 5-LOX   | 0.195±0.183 | 0.287±0.430 | 0.231±0.339 | 0.354±0.489 | 0.263±0.342 | 0.133±0.109 | 0.181±0.236 | 0.231±0.253 |
| 6- <i>trans</i> -LTB <sub>4</sub>                     | AA   | 5-LOX   | 0.605±1.13  | 1.64±1.67   | 0.350±0.842 | 0.073±0.089 | 0.233±0.342 | 1.04±1.05   | 0.035±0.017 | LOD         |
| 20-carboxy-LTB <sub>4</sub>                           | AA   | 5-LOX   | 0.176±0.089 | 0.492±1.00  | 0.175±0.082 | 0.231±0.186 | 0.188±0.071 | 0.140±0.101 | 0.135±0.036 | 0.236±0.022 |
| LXA <sub>4</sub>                                      | AA   | 5-LOX   | 0.554±1.15  | 1.02±1.15   | 0.380±0.883 | 0.132±0.075 | 0.205±0.260 | 0.847±0.909 | 0.095±0.101 | 0.092±0.016 |
| 5-HETE                                                | AA   | 5-LOX   | 43.9±104    | 102±119     | 31.3±83.1   | 2.71±1.94   | 18.0±41.6   | 105±128     | 3.74±1.44   | 3.77±0.863  |
| 5-KETE                                                | AA   | 5-LOX   | 1.35±2.48   | 4.63±4.76   | 1.55±4.02   | 0.152±0.101 | 0.728±0.915 | 4.24±5.15   | 0.305±0.245 | 0.319±0.293 |
| 5,15-DiHETE                                           | AA   | 5-LOX   | 1.87±3.19   | 2.80±3.20   | 1.53±2.59   | LOD         | 0.729±0.798 | 1.88±1.84   | 0.066±0.036 | 0.081±0.020 |
| 8,15-DiHETE                                           | AA   | 5-LOX   | 0.213±0.320 | 0.449±0.481 | 0.214±0.426 | 0.137±0.085 | 0.142±0.096 | 0.252±0.269 | 0.114±0.079 | 0.189±0.204 |
| 8-HETE                                                | AA   | ROS     | 1.72±3.34   | 6.71±9.91   | 1.52±3.51   | 0.513±0.406 | 0.726±1.00  | 3.94±4.72   | 0.516±0.345 | 0.519±0.189 |
| 9-HETE                                                | AA   | ROS     | 37.8±36.3   | 30.6±22.4   | 43.6±34.6   | 116±181     | 43.9±31.7   | 29.0±24.3   | 72.3±108    | 16.4±7.92   |
| 11-HETE                                               | AA   | ROS     | 2.28±3.27   | 5.49±5.39   | 2.25±3.74   | 1.78±2.06   | 1.37±1.06   | 3.76±3.96   | 1.31±1.11   | 0.636±0.144 |
| 12-HETE                                               | AA   | 12-LOX  | 38.4±37.3   | 31.4±23.1   | 43.9±34.7   | 119±186     | 43.7±32.7   | 29.5±24.4   | 73.7±111    | 17.0±7.56   |
| 12-KETE                                               | AA   | 12-LOX  | 5.65±6.26   | 11.8±12.0   | 6.17±6.31   | 6.05±6.09   | 4.31±2.86   | 8.71±8.05   | 4.94±4.75   | 3.65±1.79   |
| 15-HETE                                               | AA   | 15-LOX  | 3.27±3.87   | 6.58±5.83   | 3.24±3.97   | 3.24±4.08   | 2.54±1.35   | 5.07±4.61   | 2.90±1.67   | 1.36±0.555  |
| 15-KETE                                               | AA   | 15-LOX  | 1.57±2.03   | 3.26±3.06   | 1.64±2.35   | 0.770±0.263 | 1.02±0.650  | 2.99±2.88   | 0.743±0.317 | 0.951±0.256 |
| 20-HETE                                               | AA   | CYP     | 0.863±0.493 | 1.19±1.56   | 1.06±0.425  | 1.04±0.163  | 0.846±0.417 | 0.845±0.540 | 1.32±1.11   | 0.934±0.431 |
| 5(6)-EpETrE                                           | AA   | CYP     | 0.674±0.323 | 0.749±0.637 | 0.828±0.398 | 0.916±0.239 | 0.938±0.655 | 0.580±0.194 | 0.985±0.560 | 1.31±0.658  |
| 8(9)-EpETrE                                           | AA   | CYP     | 0.460±0.569 | 0.781±0.755 | 0.504±0.808 | 0.400±0.436 | 0.278±0.211 | 0.577±0.540 | 0.342±0.224 | 0.546±0.330 |
| 11(12)-EpETrE                                         | AA   | CYP     | 0.233±0.109 | 0.289±0.318 | 0.248±0.114 | 0.250±0.108 | 0.274±0.167 | 0.202±0.084 | 0.275±0.146 | 0.301±0.223 |

| Lipid mediator (nM) | PUFA | Pathway | Male        |             |             |             | Female      |             |             |             |
|---------------------|------|---------|-------------|-------------|-------------|-------------|-------------|-------------|-------------|-------------|
|                     |      |         | Healthy     | Smokers     | COPD        | COPD ExS    | Healthy     | Smokers     | COPD        | COPD ExS    |
| 5,6-DiHETrE         | AA   | EH      | 0.340±0.154 | 0.809±0.548 | 0.475±0.331 | 0.334±0.107 | 0.356±0.232 | 0.713±0.459 | 0.295±0.117 | 0.324±0.123 |
| 8,9-DiHETrE         | AA   | EH      | 0.197±0.071 | 0.266±0.110 | 0.295±0.135 | 0.326±0.295 | 0.181±0.076 | 0.215±0.064 | 0.223±0.130 | 0.192±0.084 |
| 11,12-DiHETrE       | AA   | EH      | 0.464±0.105 | 0.630±0.174 | 0.642±0.152 | 0.899±0.944 | 0.396±0.059 | 0.462±0.112 | 0.595±0.243 | 0.482±0.132 |
| 14,15-DiHETrE       | AA   | EH      | 0.632±0.154 | 0.911±0.232 | 0.947±0.249 | 0.856±0.543 | 0.594±0.106 | 0.680±0.194 | 0.875±0.35  | 0.664±0.233 |
| 13-HODE             | LA   | 15-LOX  | 16.1±13.6   | 19.7±11.2   | 14.0±17.1   | 10.1±3.06   | 13.3±7.68   | 17.3±12.9   | 12.8±7.78   | 21.0±11.8   |
| 13-KODE             | LA   | 15-LOX  | 14.0±10.3   | 16.9±10.9   | 14.7±12.0   | 10.6±3.11   | 11.9±4.51   | 16.3±10.6   | 10.8±6.19   | 16.5±6.06   |
| 9-HODE              | LA   | NA      | 16.9±17.9   | 22.6±16.4   | 13.8±20.5   | 8.01±3.18   | 12.3±7.85   | 20.1±16.5   | 11.6±7.16   | 18.8±9.69   |
| 9-KODE              | LA   | NA      | 2.65±1.50   | 3.13±1.65   | 2.59±2.15   | 1.64±0.449  | 3.46±3.26   | 2.57±1.63   | 3.28±2.57   | 5.03±2.59   |
| 9,10,13-TriHOME     | LA   | NA      | 0.868±1.26  | 1.84±4.37   | 1.14±1.26   | 0.920±0.669 | 1.54±1.68   | 0.717±1.03  | 1.25±0.985  | 2.02±2.39   |
| 9,12,13-TriHOME     | LA   | NA      | 0.684±0.954 | 1.26±2.79   | 0.755±1.03  | 0.757±0.294 | 0.841±0.973 | 0.563±0.641 | 0.800±0.557 | 1.37±1.45   |
| EKODE               | LA   | NA      | 8.21±3.70   | 7.64±4.81   | 7.18±4.13   | 12.3±13.2   | 14.8±15.8   | 6.18±3.55   | 8.45±6.17   | 11.0±6.04   |
| 9(10)-EpOME         | LA   | CYP     | 3.30±1.34   | 2.75±1.43   | 2.82±0.946  | 2.96±0.853  | 3.78±2.04   | 2.83±1.71   | 3.45±2.20   | 5.24±1.86   |
| 12(13)-EpOME        | LA   | CYP     | 5.45±1.70   | 5.11±2.62   | 5.27±2.46   | 3.96±1.35   | 5.64±2.24   | 5.42±3.57   | 5.60±2.64   | 7.40±2.42   |
| 9,10-DiHOME         | LA   | EH      | 3.28±3.68   | 2.40±1.70   | 2.61±2.26   | 2.39±1.78   | 2.23±0.892  | 3.67±5.74   | 2.25±1.3    | 2.35±0.661  |
| 12,13-DiHOME        | LA   | EH      | 4.58±2.09   | 3.96±1.94   | 3.72±2.05   | 3.65±1.81   | 4.32±1.72   | 4.17±2.39   | 4.86±2.74   | 4.88±2.20   |
| PGD <sub>1</sub>    | DGLA | COX     | 0.039±0.023 | 0.312±1.11  | 0.048±0.052 | 0.022±0.005 | 0.038±0.025 | 0.052±0.040 | 0.027±0.003 | 0.031±0.002 |
| 5-HETrE             | DGLA | 5-LOX   | 2.22±5.17   | 5.65±8.04   | 2.25±5.75   | 0.450±0.309 | 1.47±3.73   | 4.84±5.97   | 0.641±0.519 | 0.481±0.033 |
| 8-HETrE             | DGLA | ROS     | 1.17±2.26   | 2.29±2.31   | 1.23±2.82   | 0.297±0.296 | 0.623±0.630 | 1.78±1.87   | 0.466±0.243 | 0.334±0.196 |
| 15-HETrE            | DGLA | 15-LOX  | 0.677±1.34  | 1.28±1.41   | 0.837±1.84  | 0.244±0.292 | 0.352±0.324 | 1.03±1.16   | 0.307±0.157 | 0.141±0.080 |
| 9-HOTrE             | ALA  | NA      | 0.064±0.056 | 0.094±0.075 | 0.081±0.133 | 0.029±0.019 | 0.063±0.093 | 0.083±0.105 | 0.066±0.068 | 0.104±0.071 |
| 9-KOTrE             | ALA  | NA      | 0.299±0.212 | 0.281±0.176 | 0.443±0.469 | 0.149±0.084 | 0.444±0.611 | 0.239±0.142 | 0.355±0.388 | 0.418±0.260 |
| 13-HOTrE            | ALA  | 15-LOX  | 0.959±0.797 | 1.33±0.801  | 1.02±1.47   | 0.508±0.373 | 0.785±0.511 | 0.963±0.677 | 0.901±0.629 | 1.64±1.08   |
| 12(13)-EpODE        | ALA  | CYP     | 0.282±0.133 | 0.246±0.167 | 0.347±0.413 | 0.237±0.102 | 0.288±0.200 | 0.207±0.117 | 0.299±0.176 | 0.453±0.178 |
| LXA <sub>5</sub>    | EPA  | 5-LOX   | 2.31±1.36   | 1.82±1.800  | 2.27±1.40   | 2.07±0.908  | 2.19±1.03   | 1.58±1.16   | 2.15±1.09   | 2.19±1.59   |
| 5-HEPE              | EPA  | 5-LOX   | 10.6±25.    | 17.9±19.4   | 3.29±7.74   | 0.858±0.764 | 3.82±7.09   | 21./±27.7   | 1.14±1.77   | 1.04±0.411  |
| 8-HEPE              | EPA  | ROS     | 0.850±1.54  | 1.38±1.60   | 0.396±0.840 | 0.235±0.178 | 0.341±0.378 | 1.32±1.50   | 0.310±0.496 | 0.142±0.088 |
| 9-HEPE              | EPA  | ROS     | 1.28±2.15   | 1.66±2.03   | 0.523±0.965 | 0.078±0.017 | 0.519±0.614 | 1.56±1.93   | 0.348±0.633 | 0.132±0.109 |
| 11-HEPE             | EPA  | ROS     | 0.724±1.36  | 1.46±1.80   | 0.352±0.742 | 0.298±0.307 | 0.356±0.458 | 1.26±1.52   | 0.262±0.399 | 0.098±0.064 |
| 12-HEPE             | EPA  | 12-LOX  | 5.07±4.79   | 3.68±3.29   | 2.68±1.18   | 16.1±25.7   | 5.44±3.74   | 4.28±3.98   | 5.86±7.92   | 1.59±1.31   |
| 15-HEPE             | EPA  | 15-LOX  | 0.891±1.66  | 1.60±2.05   | 0.372±0.531 | 0.356±0.481 | 0.395±0.512 | 1.35±1.76   | 0.416±0.601 | 0.222±0.057 |
| 18-HEPE             | EPA  | 15-LOX  | 1.37±2.27   | 2.32±2.49   | 0.732±0.920 | 0.884±0.877 | 0.986±0.734 | 2.17±2.34   | 1.05±1.75   | 0.520±0.426 |
| 14(15)-EpETE        | EPA  | CYP     | 0.151±0.085 | 0.197±0.092 | 0.110±0.038 | 0.111±0.016 | 0.132±0.105 | 0.167±0.077 | 0.229±0.336 | 0.253±0.007 |
| 17(18)-EpETE        | EPA  | CYP     | 0.208±0.171 | 0.361±0.242 | 0.147±0.058 | 0.140±0.015 | 0.288±0.208 | 0.219±0.203 | 0.298±0.369 | 0.294±0.124 |

| Lipid mediator<br>(nM) | PUFA | Pathway | Male        |            |             |             | Female      |             |             |             |
|------------------------|------|---------|-------------|------------|-------------|-------------|-------------|-------------|-------------|-------------|
|                        |      |         | Healthy     | Smokers    | COPD        | COPD ExS    | Healthy     | Smokers     | COPD        | COPD ExS    |
| 14,15-DiHETE           | EPA  | EH      | 0.907±0.562 | 1.04±0.679 | 0.887±0.552 | 1.08±1.30   | 0.901±0.617 | 0.942±0.355 | 1.10±0.781  | 0.852±0.388 |
| 17,18-DiHETE           | EPA  | EH      | 7.38±3.32   | 8.95±5.74  | 8.03±3.81   | 10.4±10.2   | 7.77±3.97   | 7.45±2.61   | 10.6±7.14   | 6.23±1.18   |
| 8-HDoHE                | DHA  | ROS     | 3.35±6.37   | 5.45±5.75  | 2.60±6.14   | 0.789±0.218 | 1.70±1.98   | 6.16±7.61   | 1.02±1.88   | 0.956±0.807 |
| 11-HDoHE               | DHA  | ROS     | 2.33±3.51   | 3.49±3.06  | 1.52±2.78   | 1.88±2.48   | 1.62±1.10   | 3.38±3.85   | 1.22±1.59   | 0.589±0.475 |
| 14-HDoHE               | DHA  | ROS     | 17.7±15.8   | 15.5±11.6  | 11.5±7.89   | 37.5±68.5   | 19.8±13.6   | 16.2±14.1   | 17.1±22.4   | 4.98±3.02   |
| 17-HDoHE               | DHA  | 15-LOX  | 3.82±6.41   | 9.00±5.92  | 3.08±5.00   | 1.70±1.67   | 2.03±1.95   | 7.24±7.68   | 1.72±2.16   | 1.08±0.736  |
| 19(20)-EpDPE           | DHA  | CYP     | 0.601±0.412 | 1.19±0.552 | 0.539±0.275 | 0.588±0.684 | 0.937±1.36  | 1.07±0.303  | 0.742±0.971 | 1.07±0.569  |
| 19,20-DiHDPA           | DHA  | EH      | 1.90±0.627  | 2.02±1.07  | 1.75±0.469  | 1.61±0.624  | 2.78±2.8    | 2.78±2.29   | 1.73±0.625  | 1.62±0.231  |

**Table E6. Univariate statistics for 9-lipid panel identified in Figure 2A.** Statistical significance for the comparisons of all groups from the COSMIC study. Groups are described by gender in the first letter (M for males and F for females) and smoking/disease status by the following letters: HNS=healthy never smoker, HS=healthy smoker, CS=COPD smoker, CXS=COPD ex-smoker. Values shown in red are considered significant at the <0.05 level.

| Lipid           | Sig | Males       |             |              |            |             |             | Females     |             |              |            |             |             |
|-----------------|-----|-------------|-------------|--------------|------------|-------------|-------------|-------------|-------------|--------------|------------|-------------|-------------|
|                 |     | MHNS vs MHS | MHNS vs MCS | MHNS vs MCXS | MHS vs MCS | MHS vs MCXS | MCS vs MCXS | FHNS vs FHS | FHNS vs FCS | FHNS vs FCXS | FHS vs FCS | FHS vs FCXS | FCS vs FCXS |
| 9-KODE          | p   | 2.96E-01    | 7.34E-01    | 4.56E-01     | 6.50E-01   | 8.11E-02    | 2.96E-01    | 9.48E-02    | 5.25E-01    | 3.95E-01     | 4.40E-02   | 6.28E-02    | 7.91E-01    |
|                 | q   | 6.41E-01    | 9.16E-01    | 7.61E-01     | 8.64E-01   | 3.48E-01    | 6.41E-01    | 3.84E-01    | 8.05E-01    | 7.17E-01     | 2.59E-01   | 3.17E-01    | 9.41E-01    |
| TXB2            | p   | 5.66E-09    | 6.64E-07    | 5.44E-02     | 7.17E-01   | 3.09E-01    | 1.27E-01    | 5.48E-04    | 2.45E-05    | 2.79E-01     | 4.40E-02   | 9.19E-02    | 5.91E-03    |
|                 | q   | 5.75E-07    | 4.50E-05    | 2.93E-01     | 9.08E-01   | 6.46E-01    | 4.32E-01    | 1.05E-02    | 1.06E-03    | 6.26E-01     | 2.59E-01   | 3.78E-01    | 6.95E-02    |
| 5-KETE          | p   | 9.65E-06    | 4.15E-05    | 1.88E-01     | 7.17E-01   | 1.35E-01    | 1.01E-01    | 7.33E-03    | 3.54E-04    | 8.93E-01     | 2.85E-02   | 8.13E-02    | 5.91E-03    |
|                 | q   | 5.09E-04    | 1.60E-03    | 5.05E-01     | 9.08E-01   | 4.36E-01    | 3.90E-01    | 8.15E-02    | 7.81E-03    | 9.85E-01     | 2.08E-01   | 3.48E-01    | 6.95E-02    |
| 12-HHTrE        | p   | 1.56E-04    | 2.59E-04    | 2.50E-02     | 8.77E-01   | 7.63E-01    | 6.76E-01    | 1.04E-01    | 5.06E-04    | 4.24E-01     | 1.08E-02   | 3.03E-01    | 7.11E-03    |
|                 | q   | 4.37E-03    | 6.35E-03    | 1.91E-01     | 9.85E-01   | 9.36E-01    | 8.82E-01    | 3.90E-01    | 9.99E-03    | 7.47E-01     | 1.11E-01   | 6.44E-01    | 8.03E-02    |
| 12,13-DiHOME    | p   | 6.53E-02    | 7.10E-02    | 9.73E-02     | 7.43E-01   | 4.77E-01    | 6.45E-01    | 7.79E-01    | 1.08E-02    | 4.64E-01     | 2.02E-02   | 7.25E-01    | 1.54E-02    |
|                 | q   | 3.20E-01    | 3.29E-01    | 3.84E-01     | 9.20E-01   | 7.78E-01    | 8.63E-01    | 9.39E-01    | 1.11E-01    | 7.64E-01     | 1.69E-01   | 9.10E-01    | 1.42E-01    |
| 9,10-DiHOME     | p   | 2.08E-02    | 2.88E-02    | 1.38E-01     | 7.69E-01   | 6.82E-01    | 1.00E+00    | 9.25E-01    | 7.20E-03    | 2.88E-01     | 1.23E-02   | 4.00E-01    | 1.19E-03    |
|                 | q   | 1.71E-01    | 2.08E-01    | 4.41E-01     | 9.36E-01   | 8.87E-01    | 9.97E-01    | 9.97E-01    | 8.07E-02    | 6.34E-01     | 1.21E-01   | 7.21E-01    | 1.97E-02    |
| 9(10)-EpOME     | p   | 6.96E-02    | 5.77E-01    | 3.66E-01     | 1.69E-01   | 3.65E-02    | 2.33E-01    | 2.92E-04    | 1.97E-01    | 9.35E-01     | 4.65E-05   | 1.64E-03    | 2.85E-01    |
|                 | q   | 3.29E-01    | 8.31E-01    | 6.98E-01     | 4.76E-01   | 2.36E-01    | 5.68E-01    | 6.92E-03    | 5.10E-01    | 9.97E-01     | 1.66E-03   | 2.48E-02    | 6.34E-01    |
| 12(13)-EpOME    | p   | 4.28E-01    | 7.88E-01    | 3.66E-01     | 2.74E-01   | 9.69E-02    | 3.82E-01    | 2.39E-03    | 1.04E-01    | 8.08E-01     | 7.61E-05   | 7.68E-03    | 1.26E-01    |
|                 | q   | 7.50E-01    | 9.41E-01    | 6.98E-01     | 6.21E-01   | 3.84E-01    | 7.12E-01    | 3.31E-02    | 3.90E-01    | 9.46E-01     | 2.52E-03   | 8.41E-02    | 4.32E-01    |
| 9,10,13-TriHOME | p   | 2.62E-02    | 9.00E-01    | 2.73E-02     | 5.57E-02   | 1.32E-03    | 6.14E-02    | 3.36E-05    | 8.68E-02    | 4.64E-01     | 1.58E-06   | 1.64E-03    | 5.96E-01    |
|                 | q   | 1.98E-01    | 9.91E-01    | 2.04E-01     | 2.96E-01   | 2.13E-02    | 3.13E-01    | 1.33E-03    | 3.66E-01    | 7.64E-01     | 1.00E-04   | 2.48E-02    | 8.44E-01    |

**Table E7. Classification of independent female COPD cohort based upon multivariate modeling of BALF lipid mediator levels**

|               | <b>Members</b> | <b>Correct</b> | <b>COPD</b> | <b>Smoker</b> |
|---------------|----------------|----------------|-------------|---------------|
| <b>COPD</b>   | 6              | 83.3%          | 5           | 1             |
| <b>Smoker</b> | 7              | 100%           | 0           | 7             |
| <b>Total</b>  | 13             | 92.3%          | 5           | 8             |

The OPLS model from Figure 2A was used to classify an independent cohort of female Smokers and COPD (from the validation cohort). Fisher’s exact test p=0.005.

The validation cohort consisted of 7 current female smokers (49–61 years; BMI 20.5–32.6) with normal lung function and 6 current female smokers with COPD (48–73 years; BMI 20.0–27.7; GOLD stage II-III; FEV<sub>1</sub>=44-68%; FEV<sub>1</sub>/FVC<70) with arterial oxygen saturation (SaO<sub>2</sub>) >90%. Further information on the validation cohort can be found in the original publication by Blidberg *et al.*, 2013 (8).

**Table E8. Classification of independent male COPD cohort based upon multivariate modeling of BALF lipid mediator levels**

|               | <b>Members</b> | <b>Correct</b> | <b>COPD</b> | <b>Smoker</b> |
|---------------|----------------|----------------|-------------|---------------|
| <b>COPD</b>   | 5              | 60.0%          | 3           | 2             |
| <b>Smoker</b> | 9              | 55.6%          | 4           | 5             |
| <b>Total</b>  | 14             | 57.1%          | 7           | 7             |

The OPLS model from Figure 2A was used to classify an independent cohort of male Smokers and COPD (from the validation cohort). Fisher’s exact test p=0.5.

The validation cohort consisted of 9 current male smokers (49–61 years; BMI 20.5–32.6) with normal lung function and 5 current male smokers with COPD (48–73 years; BMI 20.0–27.7; GOLD stage II-III; FEV<sub>1</sub>=44-68%; FEV<sub>1</sub>/FVC<70) with arterial oxygen saturation (SaO<sub>2</sub>) >90%. Further information on the validation cohort can be found in the original publication by Blidberg *et al.*, 2013 (8).

**Figure E1. Overview of synthetic pathways for the lipid mediators quantified in BALF and serum.** The synthetic route of each lipid species as well as the polyunsaturated fatty acid (PUFA) substrate is provided. The compounds  $LTA_4$ ,  $PGH_x$  and  $PGI_2$  are unstable intermediates that were not measured. Lipid nomenclature is provided in Table S4. The primary enzyme responsible for each conversion, when known, is indicated in the ovals. Lipid synthetic routes are not unambiguous and many compounds can be produced via multiple routes (e.g., 11(R)-HETE can be produced by acetylated COX). An “x” (e.g.,  $PGE_x$ ) indicates that there are multiple PUFA substrates possible for a compound, with  $x=2$  for arachidonic acid-derived compounds and  $x=1$  for dihomo-gamma-linolenic acid-derived compounds. LA=linoleic acid, ALA=alpha-linolenic acid, AA=arachidonic acid, DHGLA=dihomo-gamma-linolenic acid, EPA=eicosapentaenoic acid, DHA=docosahexaenoic acid. LOX=lipoxygenase, COX=cyclooxygenase, CYP=cytochrome P450, EH=epoxide hydrolase, ROS=reactive oxygen species, NA=not assigned.

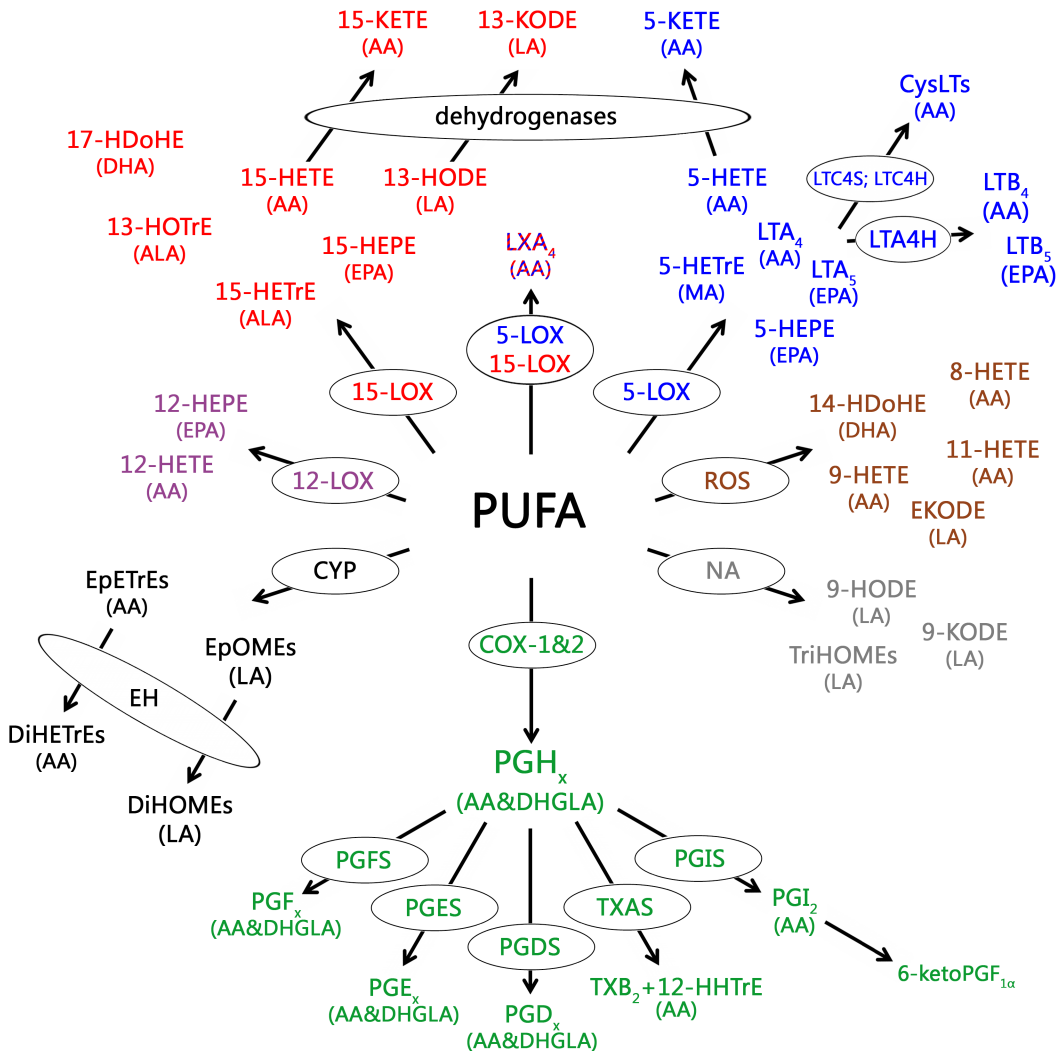



**Figure E2. Concentration of cells in BALF and serum.** **A)** BALF macrophages, **B)** BALF neutrophils, **C)** BALF eosinophils, **D)** blood platelets, **E)** blood leukocytes, and **F)** goblet cells (AB-PAS). Subjects are divided into smokers with normal lung function (Smokers, circles) and smokers with COPD (COPD, squares). Open symbols indicate males and closed symbols females. Significance is indicated by the non-parametric Mann-Whitney test. Data are expressed as millions of cells per L of BALF.

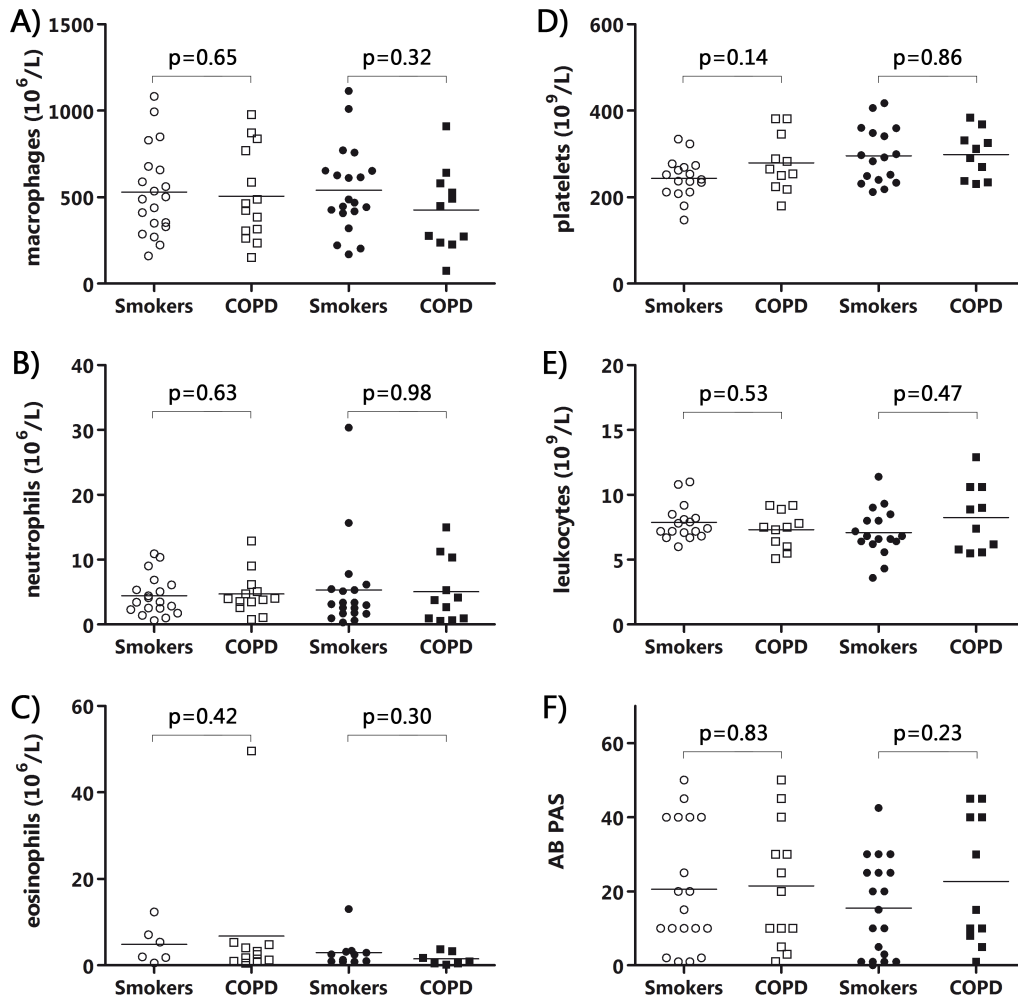

**Figure E3. Variable selection to identify the lipid mediators driving the separation of female COPD patients and Smokers with normal lung function.** Variables selected from the OPLS model based on all lipid mediators (1+1 components,  $R^2Y=0.75$ ,  $Q^2=0.47$ , CV-ANOVA  $p=6.0 \times 10^{-4}$ ) was performed using a cutoff of  $|p(\text{corr})| \geq 0.4$  as well as variable importance in the projection ( $VIP \geq 1.0$ ). A total of 9 lipids fulfilled both selection criteria: 9,10,13-TriHOME, 12(13)-EpOME, 9(10)-EpOME, 9,10-DiHOME, 12,13-DiHOME, 12-HHTrE, 5-KETE, TXB<sub>2</sub> and 9-KODE (red dots). Green dots indicate those variables that did not fulfill the selection criteria.

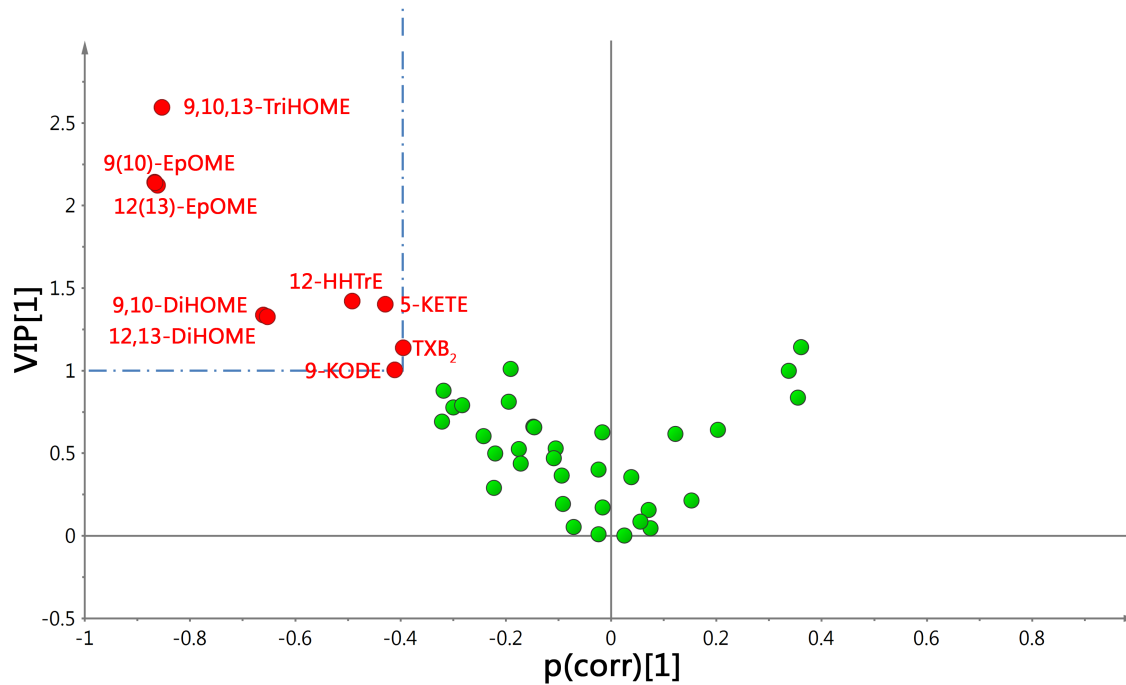

Figure E4. Subjecting the 9-lipid model to permutation tests confirmed that the observed differences did not occur by random, as confirmed by the low y-intercept of  $R^2$ , and the negative y-intercept of  $Q^2$ .

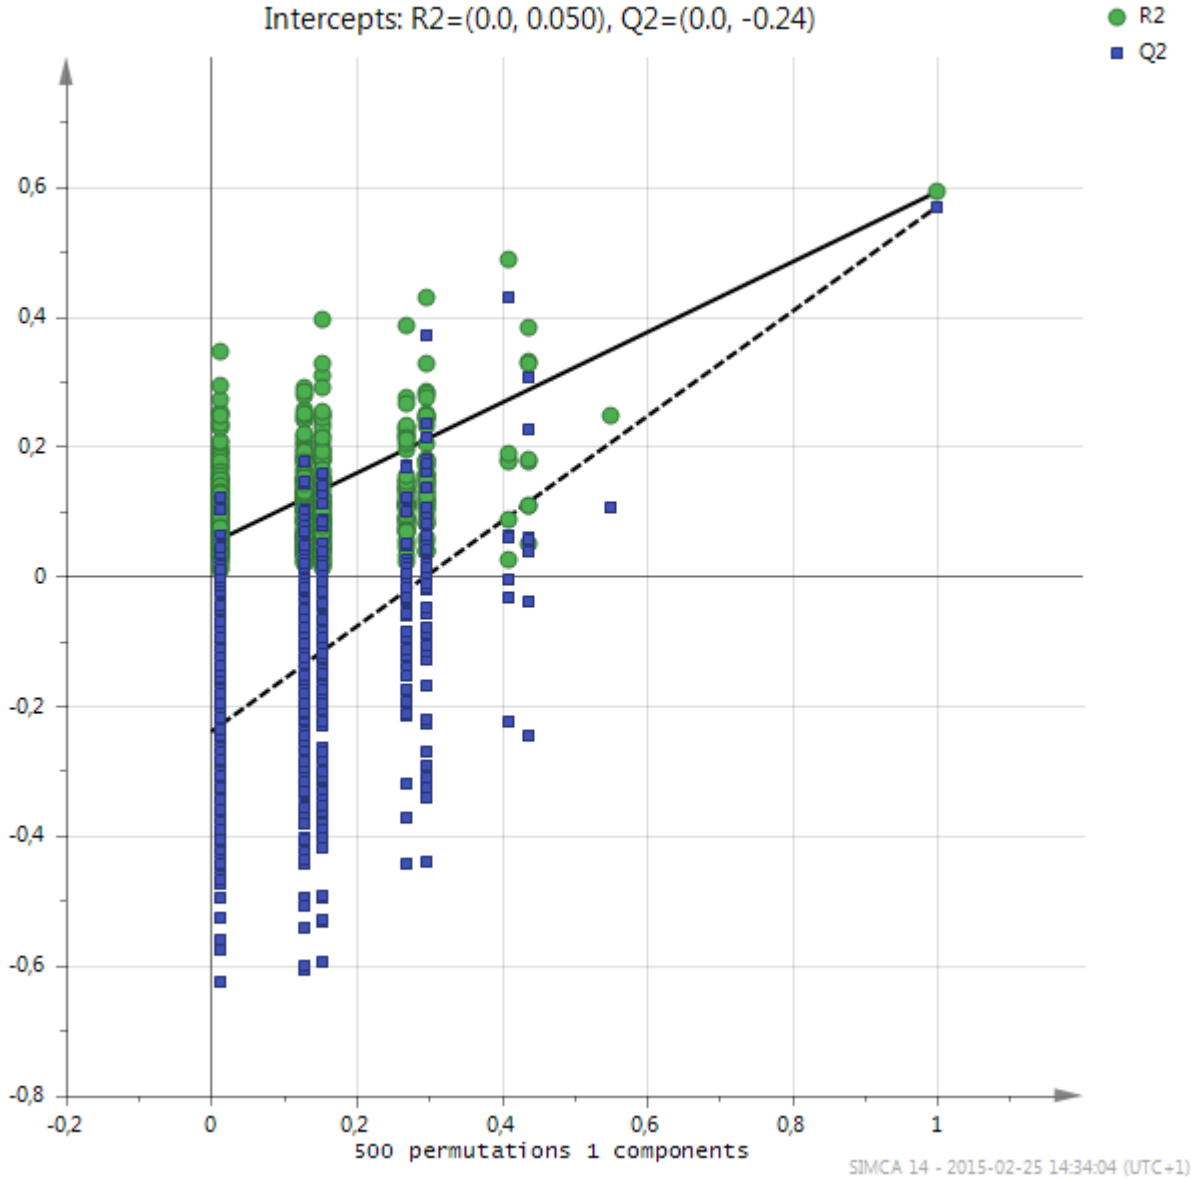

**Figure E5. The effect of menopausal status and estrogen replacement therapy on the 9 lipid mediators from the multivariate (OPLS) model in Figure 2A among the female smokers with normal lung function.** No separation with PCA was detected, and the displayed forced model indicates a homogeneous distribution of pre-menopausal (red), post-menopausal not taking estrogens (green), and post-menopausal subjects taking estrogen replacement therapy (blue). As such, it can be concluded that the observed differences with regards to the female smoking COPD group, where all subjects were post-menopausal without estrogen therapy, were not driven by these factors.

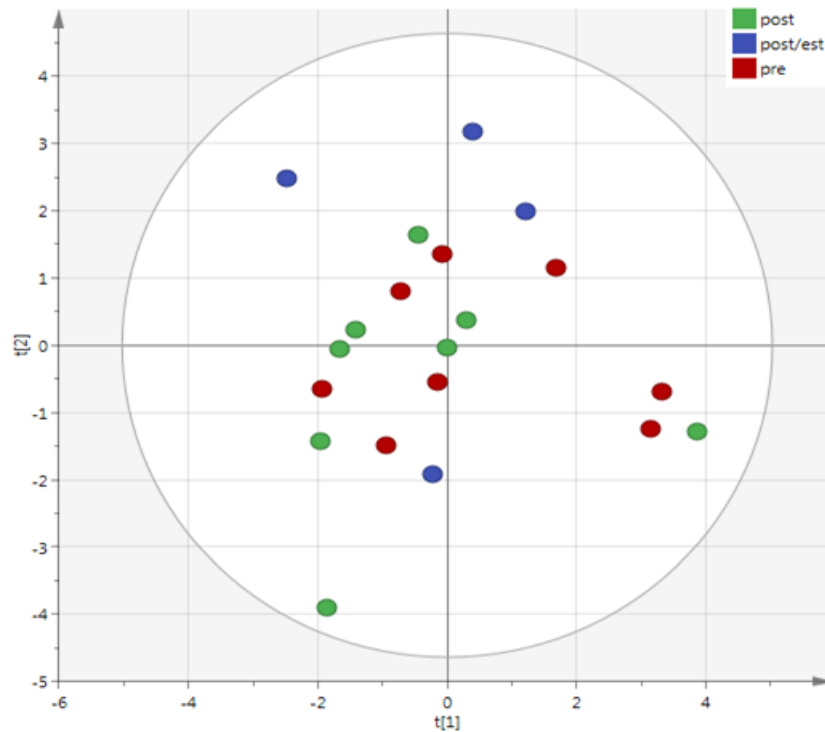

**Figure E6. Shared and unique structures (SUS) plot for gender in lipid mediators in serum.**

Correlation analysis between the female and male OPLS models based on selected lipid mediators in serum from Smoker vs. COPD is displayed, with females displayed on the X-axis (1+1 components,  $R^2Y=0.72$ ,  $Q^2=0.67$ , CV-ANOVA  $p=5 \times 10^{-6}$ ) and males on the Y-axis (1+1 components,  $R^2Y=0.60$ ,  $Q^2=0.45$ , CV-ANOVA  $p=0.03$ ). No lipid mediator falls in the areas selective for disease correlation in males or females.

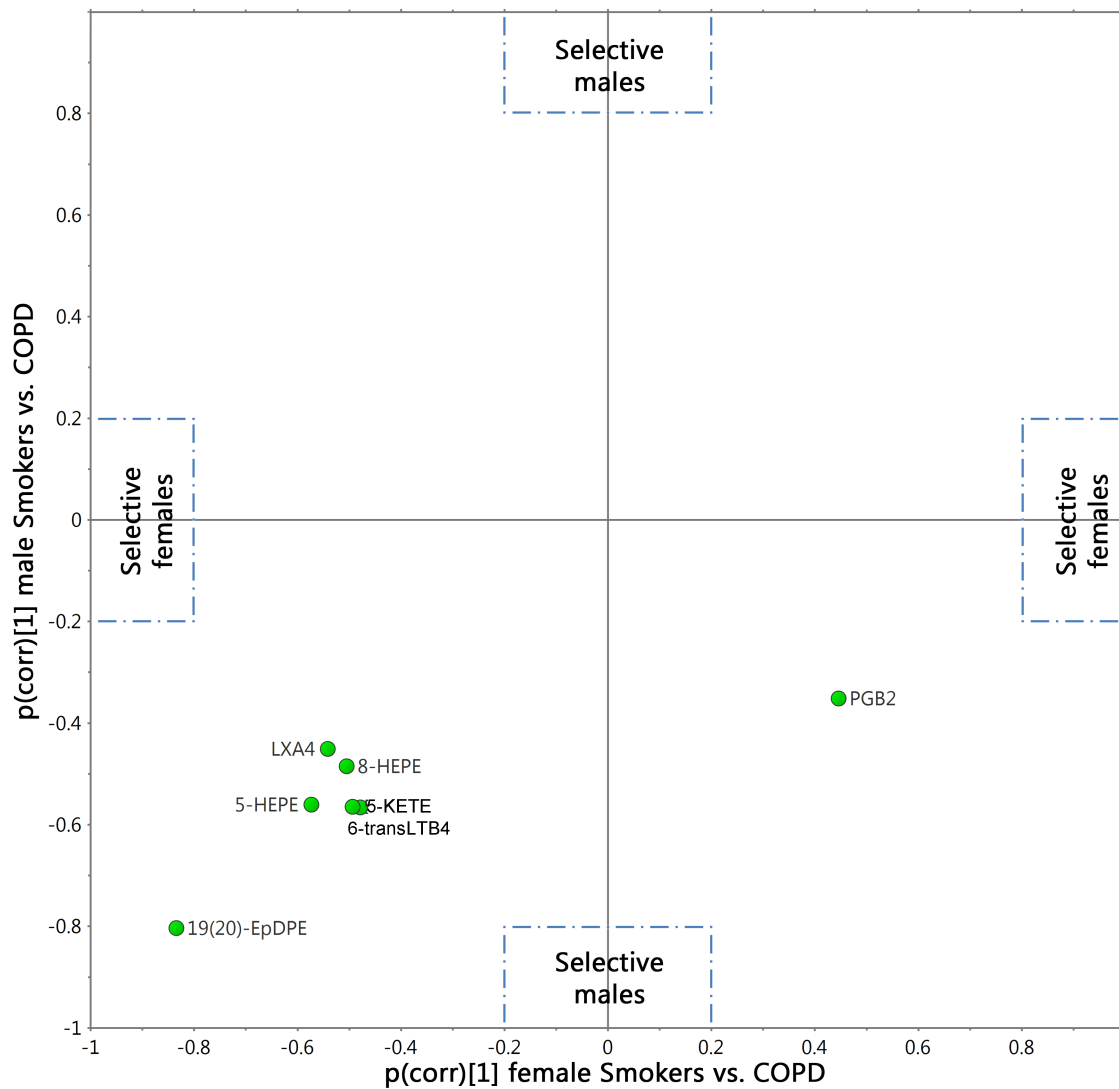

**Figure E7. Cytochrome P450-derived arachidonate mediators in BALF in relation to gender, smoking status and disease.** Lipid mediators from arachidonic acid: epoxy-eicosatrienoic acids, EpETrEs (A) and dihydroxy-eicosatrienoic acids, DiHETrEs (B). Subjects are divided into smokers with normal lung function (Smokers, circles) and smokers with COPD (COPD, squares). Open symbols indicate males and closed symbols females. Significance is indicated by the non-parametric Mann-Whitney test. Lipid mediator nomenclature is provided in Table E1

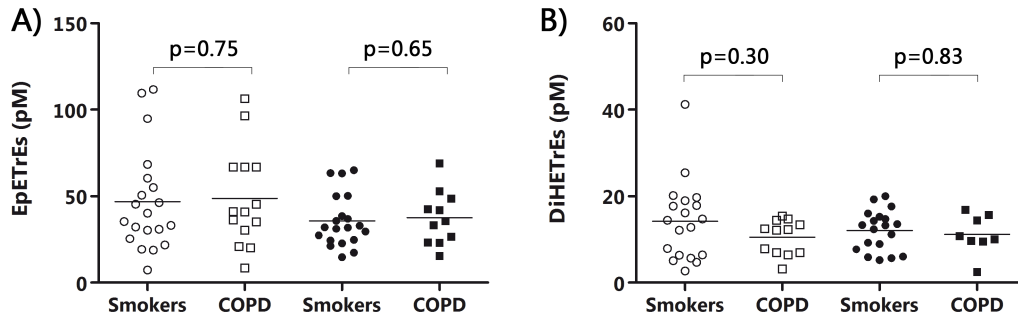

**Figure E8. Correlation between lipid mediators in BALF with lung function, neutrophils and goblet cells.** **A)** The correlation between lung function parameters (FEV<sub>1</sub> and FEV<sub>1</sub>/FVC) vs. the concentrations of EpOMEs and DIHOMEs in male COPD smokers (PLS inner relation,  $r=0.65$ ,  $p=0.012$ ,  $n=14$ ). **B)** The correlation between neutrophil abundance in BALF and 9,10,13-TriHOME (PLS inner relation,  $r=0.27$ ,  $p=0.35$ ,  $n=14$ ). **C)** The correlation between goblet cell abundance vs. the 2 EpOME lipid mediators (leukotoxin and isoleukotoxin; PLS inner relation,  $r=0.46$ ,  $p=0.14$ ,  $n=12$ ).

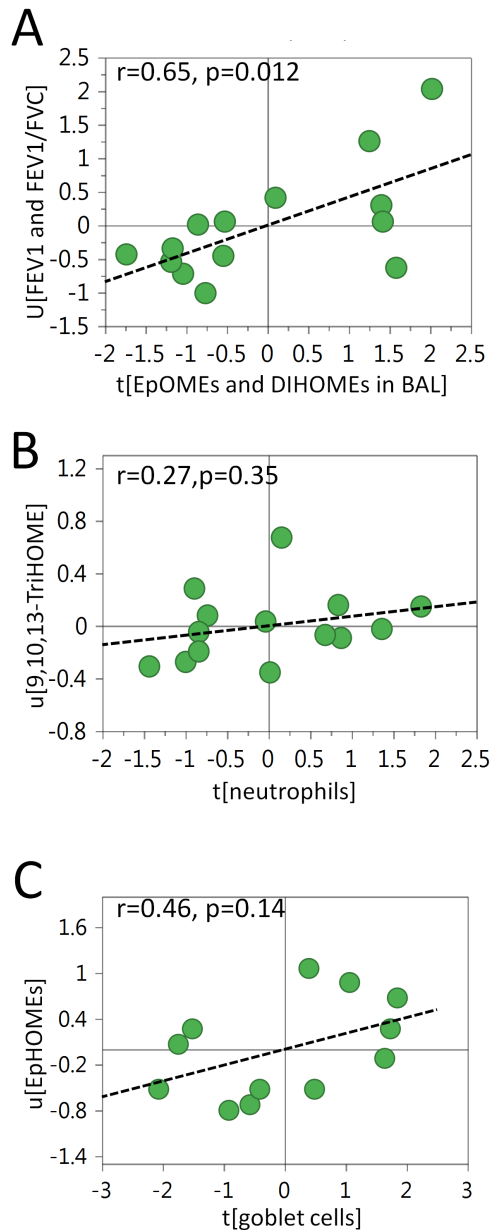

## References

1. Eklund A, Blaschke E. Relationship between changed alveolar-capillary permeability and angiotensin converting enzyme activity in serum in sarcoidosis. *Thorax*. 1986;41(8):629-34.
2. Löfdahl JM, Cederlund K, Nathell L, Eklund A, Sköld CM. Bronchoalveolar lavage in COPD: fluid recovery correlates with the degree of emphysema. *Eur Respir J*. 2005;25(2):275-81.
3. Karimi R, Tornling G, Grunewald J, Eklund A, Skold CM. Cell recovery in bronchoalveolar lavage fluid in smokers is dependent on cumulative smoking history. *PloS one*. 2012;7(3):e34232.
4. Balgoma D, Larsson J, Rokach J, Lawson JA, Daham K, Dahlén B, et al. Quantification of lipid mediator metabolites in human urine from asthma patients by electrospray ionization mass spectrometry: controlling matrix effects. *Anal Chem*. 2013;85(16):7866-74.
5. Bolstad BM, Irizarry RA, Astrand M, Speed TP. A comparison of normalization methods for high density oligonucleotide array data based on variance and bias. *Bioinformatics*. 2003;19(2):185-93.
6. Gentleman RC, Carey VJ, Bates DM, Bolstad B, Dettling M, Dudoit S, et al. Bioconductor: open software development for computational biology and bioinformatics. *Genome Biol*. 2004;5(10):R80.
7. Smyth GK. Linear models and empirical bayes methods for assessing differential expression in microarray experiments. *Stat Appl Genet Mol Biol*. 2004;3:Article3.
8. Blidberg K, Palmberg L, James A, Billing B, Henriksson E, Lantz AS, et al. Adhesion molecules in subjects with COPD and healthy non-smokers: a cross sectional parallel group study. *Respir Res*. 2013;14:47.
